# 1 **An inducible AraC that responds to blue light instead of arabinose**

2 Edoardo Romano<sup>1,2,4,6</sup>, Armin Baumschlager<sup>3,6</sup>, Emir Bora Akmeriç<sup>1,2</sup>, Navaneethan  
3 Palanisamy<sup>1,2,4</sup>, Moustafa Houmani<sup>3</sup>, Gregor Schmidt<sup>3</sup>, Mehmet Ali Öztürk<sup>1,2</sup>, Leonard Ernst<sup>5</sup>,  
4 Mustafa Khammash<sup>3\*</sup> and Barbara Di Ventura<sup>1,2\*</sup>

5

6 <sup>1</sup>Faculty of Biology, Institute of Biology II, University of Freiburg, Freiburg, Germany

7 <sup>2</sup>Centers for Biological Signalling Studies BIOSS and CIBSS, University of Freiburg, Freiburg, Germany

8 <sup>3</sup>Department of Biosystems Science and Engineering, ETH Zürich, Basel, Switzerland

9 <sup>4</sup>Heidelberg Biosciences International Graduate School (HBIGS), University of Heidelberg, Heidelberg,  
10 Germany

11 <sup>5</sup>BioQuant Center for Quantitative Biology, University of Heidelberg, Heidelberg, Germany

12 <sup>6</sup>These authors contributed equally: E. Romano, A. Baumschlager

13 \* email: [mustafa.khammash@bsse.ethz.ch](mailto:mustafa.khammash@bsse.ethz.ch); [barbara.diventura@bio.uni-freiburg.de](mailto:barbara.diventura@bio.uni-freiburg.de)

14

15 **In *Escherichia coli*, the operon responsible for the catabolism of L-arabinose is**  
16 **regulated by the dimeric DNA-binding protein AraC. In the absence of L-**  
17 **arabinose, AraC binds to the distal I<sub>1</sub> and O<sub>2</sub> half-sites, leading to repression of**  
18 **the downstream P<sub>BAD</sub> promoter. In the presence of the sugar, the dimer changes**  
19 **conformation and binds to the adjacent I<sub>1</sub> and I<sub>2</sub> half-sites, resulting in the**  
20 **activation of P<sub>BAD</sub>. Here we engineer blue light-inducible AraC dimers in**  
21 ***Escherichia coli* (BLADE) by swapping the dimerization domain of AraC with**  
22 **blue light-inducible dimerization domains. Using BLADE to overexpress proteins**  
23 **important for cell shape and division site selection, we reversibly control cell**  
24 **morphology with light. We demonstrate the exquisite light responsiveness of**  
25 **BLADE by employing it to create bacteriographs with an unprecedented quality.**  
26 **We then employ it to perform a medium-throughput characterization of 39 *E. coli***  
27 **genes with poorly defined or completely unknown function. Finally, we expand the**

28 **initial library and create a whole family of BLADE transcription factors (TFs),**  
29 **which we characterize using a novel 96-well light induction setup. Since the P<sub>BAD</sub>**  
30 **promoter is commonly used by microbiologists, we envisage that the BLADE TFs**  
31 **will bring the many advantages of optogenetic gene expression to the field of**  
32 **microbiology.**

33

34 While the preferred carbon source for *E. coli* under most conditions is glucose, other  
35 sugars, such as lactose or arabinose, also support cell growth, albeit typically at a slower  
36 rate<sup>1,2</sup>. Three operons are responsible for the uptake and catabolism of L-arabinose: the  
37 *BAD* operon, encoding three catabolic enzymes that convert L-arabinose to D-  
38 xylulose-5-phosphate; the *FGH* operon, encoding the transporters that regulate L-  
39 arabinose uptake when its concentration in the extracellular environment is low, and  
40 the *araE* operon, encoding a low-affinity transporter that acts at high extracellular L-  
41 arabinose concentrations<sup>3,4</sup>. In the absence of L-arabinose, P<sub>BAD</sub> is repressed by AraC,  
42 the regulator of the system, bound to the distal I<sub>1</sub> and O<sub>2</sub> half-sites, which causes the  
43 formation of a DNA loop that sterically blocks the access of the RNA polymerase to  
44 the promoter (Fig. 1a). In the presence of L-arabinose, transcription from the P<sub>BAD</sub>, P<sub>FGH</sub>  
45 and P<sub>E</sub> promoters is activated by AraC, which additionally negatively feeds back on its  
46 own promoter P<sub>C</sub>, found upstream of, and in reverse orientation to, P<sub>BAD</sub><sup>3,4</sup>. Activation  
47 results from AraC binding to the adjacent I<sub>1</sub> and I<sub>2</sub> half-sites, which recruits the RNA  
48 polymerase (Fig. 1a). AraC is composed of an N-terminal dimerization domain (DD)  
49 and a C-terminal DNA binding domain (DBD) connected via a linker (Fig. 1b).  
50 Interestingly, AraC is always a homodimer, whether bound to arabinose or not<sup>4</sup>.  
51 Binding of arabinose triggers a conformational change in AraC, which results in the  
52 two DBDs being oriented in a way that favors their interaction with the I<sub>1</sub> and I<sub>2</sub> half-

53 sites rather than the I<sub>1</sub> and O<sub>2</sub> half-sites (Fig. 1a)<sup>3, 4</sup>. The mechanism explaining this  
54 conformational change, which involves ligand-induced regulation of the position of the  
55 N-terminal arm of AraC, has been named the light switch, despite AraC not being a  
56 photoreceptor<sup>3</sup>. We reasoned that, if AraC could be made to respond to light, as  
57 previously done for other bacterial and eukaryotic transcriptional regulators<sup>5, 6</sup>, it  
58 would be possible for microbiologists to reversibly steer, with high spatio-temporal  
59 resolution, a great variety of biological processes relying on gene expression. They  
60 would simply employ well-known P<sub>BAD</sub>-based vectors, such as pBAD33, modified only  
61 to express the engineered light-sensitive AraC in place of the arabinose-sensitive  
62 natural one. Importantly, strains previously constructed to control with arabinose a  
63 genomic locus, in which the P<sub>BAD</sub> promoter was inserted in place of an endogenous  
64 promoter<sup>7-9</sup>, would be fully compatible with this system. Here we show that, by  
65 swapping the AraC DD with the blue light-triggered dimerizing protein VVD<sup>10</sup>, and by  
66 selecting the appropriate linker between VVD and the DBD, we are able to render AraC  
67 blue light responsive. We characterize this novel AraC, which we name BLADE (for  
68 Blue Light-inducible AraC Dimers in *E. coli*), in terms of kinetics, reversibility, and  
69 light dependence. Taking advantage of the ability of BLADE to trigger gene expression  
70 only in illuminated cells, we perform bacterial photography and reproduce the Blade  
71 Runner movie poster at high resolution using a lawn of bacteria expressing the  
72 superfolder green fluorescent protein (sfGFP) under the control of BLADE. We then  
73 utilize BLADE to control *E. coli* cell morphology by overexpressing MinD<sup>Δ10</sup>, MreB  
74 and RodZ. Employing a previously constructed *E. coli* strain where endogenous *rodZ*  
75 is under the control of the P<sub>BAD</sub> promoter<sup>7</sup>, we demonstrate that light, but not arabinose,  
76 allows for the reversible switching between round and rod cell morphologies. To  
77 showcase the advantage of light as external trigger in medium and high-throughput

78 assays, we build a library of 117 constructs to characterize 39 *E. coli* genes with  
79 unknown or poorly defined function in terms of intracellular localization and effect on  
80 cell growth and morphology. We investigate the mechanism of BLADE action *in vivo*,  
81 and show that beyond contacting the I<sub>2</sub> half-site in the lit state, the dark state involves  
82 the formation of aggregates, which likely contribute to the tightness of the system. We  
83 engineer an entire family of BLADE TFs creating a much larger library comparing two  
84 light-inducible dimerization domains, different linkers and positioning of the  
85 components. Interestingly, we find that the order of the light-dependent dimerizing and  
86 DBD domains does not need to resemble that of wild type AraC. We show that a  
87 synthetic promoter containing two I<sub>1</sub> half-sites is still light-inducible and leads to higher  
88 light/dark fold change in gene expression compared to the wild type P<sub>BAD</sub> promoter  
89 based on I<sub>1</sub>-I<sub>2</sub> in a small range of BLADE concentrations. Finally, we develop a high-  
90 throughput characterization approach using a novel 96-well light induction setup,  
91 which can be easily built and employed, to find optimal expression levels of the  
92 BLADE TFs for best performance. We envision that BLADE will stimulate the  
93 incorporation of optogenetic experiments in microbiology due to its compatibility with  
94 previously constructed strains and plasmids, its added functionality that cannot be  
95 easily achieved with chemical inducers, and its reliable performance.

96

## 97 **Results**

### 98 **Creation of a small library of chimeric VVD-AraC fusion constructs**

99 Inspired by a previous study in which chimeric AraC constructs have been cloned to  
100 probe the role of the DD and DBD<sup>11</sup>, we reasoned that, by exchanging the dimerization  
101 domain of AraC with a light-inducible dimerization domain (Fig. 1b), we would be able  
102 to control with light the switching of this engineered AraC from monomer to dimer



103 (Fig. 1c). In its monomeric form, the engineered AraC would contact the high-affinity  
104 I<sub>1</sub> half-site<sup>12</sup>, but not the low-affinity I<sub>2</sub> half-site, needed to recruit the RNA polymerase.  
105 Its function as a light-inducible TF would depend on finding the appropriate linker  
106 supporting the correct orientation of the two DBDs after dimer formation, permissive  
107 of I<sub>1</sub>-I<sub>2</sub> binding (Fig. 1c). As the light-triggered dimerization domain we selected VVD,  
108 which has often been successfully employed to control with light the dimerization of  
109 proteins of interest<sup>5, 6, 13, 14</sup>. VVD senses blue light *via* the flavin adenine di-nucleotide  
110 (FAD) chromophore<sup>10</sup>. Blue light triggers the formation of a cysteinyl-flavin adduct,  
111 which generates a new hydrogen bond network that releases the N-terminus (N-  
112 terminal cap) from the protein core and restructures it creating a new dimerization  
113 interface<sup>15, 16</sup>. We swapped AraC dimerization domain with VVD<sup>N56K/C71V</sup>, a double  
114 mutant shown to stabilize the dimer<sup>5</sup>, and cloned seven constructs having different  
115 linkers between AraC<sub>DBD</sub> and VVD (Fig. 1d). We removed the *araC* gene from  
116 pBAD33, and introduced two constitutive promoters of different strength (J23101\* and  
117 J23101\*\*) to drive the expression of the chimeric VVD-AraC<sub>DBD</sub> fusion constructs  
118 (Supplementary Fig. 1). For a reporter gene, we cloned *mCherry* downstream of the  
119 P<sub>BAD</sub> promoter (Fig. 1e). As positive control, we constructed the same plasmid carrying  
120 full-length AraC in place of the VVD-AraC fusion (Supplementary Fig. 2c), while the  
121 plasmid without any TF was constructed to serve as negative control to monitor leaky  
122 expression from P<sub>BAD</sub> (Supplementary Fig. 2b). Flow cytometry analysis of *E. coli*  
123 MG1655 cells transformed with the small library of VVD-AraC fusions, as well as the  
124 negative and the positive controls, kept in the dark or illuminated with 460 nm light (5  
125 W/m<sup>2</sup>) for 4 hours showed that all 14 VVD-AraC constructs were light-inducible,  
126 despite being less optimal than full-length AraC (Fig. 1f and Supplementary Fig. 3).  
127 Different linkers corresponded to different amounts of gene expression. With the

128 weaker constitutive promoter driving expression of the VVD-AraC<sub>DBD</sub> fusion  
129 constructs (JS23101\*), the levels of reporter expression in the dark approached those  
130 of the negative control, to which the values were normalized (Fig. 1f). The stronger  
131 constitutive promoter (JS23101\*\*) led to significantly higher expression of the reporter  
132 gene after blue light illumination for all constructs, albeit at the cost of increased  
133 leakiness in the dark (Fig. 1f). Nonetheless, for some of the fusions, the light/dark fold  
134 change was higher with this promoter. We named a generic member of this family of  
135 Blue Light-inducible AraC Dimers in *E. coli* BLADE and the pBAD33-derived  
136 corresponding expression plasmid pBLADE (Fig. 1e). Before continuing with further  
137 characterization and utilization of BLADE, we verified that the blue light required for  
138 its activation was well tolerated by the cells (Supplementary Fig. 4).

139

#### 140 **Characterization of BLADE**

141 A clear advantage of light as an external trigger is that it can be easily turned off,  
142 enabling reversible control of gene expression, without the need of potentially  
143 damaging and time-consuming washing steps. We exposed *E. coli* MG1655 cells  
144 transformed with pBLADE-mCherry to alternating 2 hours-cycles of blue light and  
145 darkness, for a total of 3 illumination cycles and measured mCherry levels via flow  
146 cytometry at the end of every phase. The same expression levels were reached after  
147 every illumination phase, and the reporter was repressed to the same extent after every  
148 dark phase (Fig. 1g). Next, we measured the kinetics of mCherry expression from  
149 pBLADE and found that the half-maximum was reached after about 2.5 hours of  
150 induction with light, while the levels plateaued after 5 hours of light induction (Fig.  
151 1h). To assess the requirement of BLADE in terms of blue light, we measured mCherry

152 levels obtained at different light intensities, and found that 1 W/m<sup>2</sup> was sufficient to  
153 obtain reporter gene expression levels close to the saturation value (Fig. 1i).

154 Next we sought to demonstrate that BLADE is useful to control the expression of  
155 functional *E. coli* proteins, and not only fluorescent reporters. We thus cloned *eyfp-*  
156 *minD* into pBLADE. MinD is a dynamically membrane-bound ATPase, which,  
157 together with MinC and MinE, constitutes the Min system, a machinery needed to place  
158 the divisome at mid-cell<sup>17</sup> and to aid chromosome segregation<sup>18</sup>. In order to exert its  
159 inhibitory function against FtsZ, the protein that starts divisome assembly, MinC must  
160 be recruited to the cytoplasmic membrane by MinD<sup>19, 20</sup>. In *E. coli*, MinD – and,  
161 consequently, MinC – oscillate from pole to pole due to the action of MinE, with a  
162 period of 50-60 seconds at room temperature<sup>21</sup>. When averaged over time, MinC/D  
163 concentration is highest at the poles and minimal at mid-cell, causing the septum to  
164 form at mid-cell. Overexpression of MinD results in filamentation, because endogenous  
165 MinE is not sufficient to displace all MinD molecules from the membrane, allowing  
166 the MinCD complex to become stably and homogeneously membrane-bound, inhibiting  
167 FtsZ everywhere<sup>17</sup>. Thus, MinD is a good candidate to check the tightness of the  
168 BLADE system. Time-lapse fluorescence microscopy showed that eYFP-MinD  
169 oscillations were present only in cells illuminated with blue light and not in those kept  
170 in the dark (Supplementary Fig. 5a and Supplementary Video 1). The distribution of  
171 the cell length for both non-induced and induced samples was comparable to that of the  
172 same strain transformed with the negative control (Supplementary Fig. 5b).

173

#### 174 **Spatial control of gene expression**

175 One of the benefits of optogenetic induction is the ability to modulate gene expression  
176 in a spatially dependent fashion. To showcase how BLADE could be used to control

177 expression of a target gene only in selected cells, we cloned sfGFP<sup>22</sup> into pBLADE. *E.*  
178 *coli* MG1655 cells transformed with pBLADE-sfGFP were then applied to an agar pad  
179 and subjected to confocal microscopy to expose a limited area (6.4  $\mu\text{m}^2$ ) to blue light  
180 every 5 minutes. After 3 hours, sfGFP was expressed up to 6.7-fold more in the  
181 illuminated cells compared to the surrounding non-illuminated cells (Supplementary  
182 Fig. 6). Another interesting application of light-inducible TFs that relies on the  
183 possibility to shine light on a plate in desired patterns, is bacterial photography<sup>23</sup>. To  
184 assess the effectiveness of BLADE in this type of application, we covered a lawn of *E.*  
185 *coli* MG1655 cells transformed with pBLADE-sfGFP with a photomask depicting the  
186 Blade Runner movie poster (Fig. 2a). We illuminated the plate with blue light overnight  
187 and then took several microscopy pictures and stitched them together (Fig. 2b). The  
188 sensitive light response of BLADE yielded a good contrast, resulting in a high quality  
189 bacteriograph that allowed for the faithful reproduction of the details in the poster, such  
190 as facial expressions (Fig. 2c).

191

## 192 **Controlling *E. coli* cell morphology with BLADE**

193 Cell morphology impacts growth and survival in diverse environments<sup>24,25</sup>. Being able  
194 to generate desired cell morphologies with light could pave the way to performing  
195 experiments to better understand the contribution of cell morphology to bacterial fitness  
196 and adaptation to a particular environment. To demonstrate light control of cell  
197 morphology, we selected three *E. coli* proteins to overexpress: MinD <sup>$\Delta$ 10</sup>, MreB and  
198 RodZ. MinD <sup>$\Delta$ 10</sup> is a truncated form of MinD lacking the last 10 amino acids constituting  
199 the membrane targeting sequence (MTS). Without the MTS, MinD <sup>$\Delta$ 10</sup> cannot associate  
200 with the membrane and remains cytoplasmic. It however maintains the ability to  
201 homodimerize<sup>26</sup>. We hypothesized that MinD <sup>$\Delta$ 10</sup> could heterodimerize with

202 endogenous MinD. The heterodimer formed by MinD and MinD<sup>Δ10</sup> would not be able  
203 to stably bind to the membrane, because a monovalent MTS is not sufficient for this<sup>27</sup>.  
204 With MinD sequestered into the cytoplasm, endogenous MinC would no longer be  
205 recruited to the membrane, and FtsZ should be free to start divisome assembly at the  
206 poles, leading to the formation of anucleated mini-cells and variably long cells (Fig.  
207 3a), which would manifest as a multimodal cell length distribution in a population of  
208 cells. MreB is the bacterial actin homolog, necessary for the establishment and  
209 maintenance of rod shape and cell wall synthesis<sup>28-30</sup>. Its assembly is regulated by  
210 RodZ, a transmembrane protein that binds MreB, altering the conformational dynamics  
211 and intrinsic curvature of MreB polymers<sup>31-33</sup>. It has been previously established that  
212 overexpression of MreB or RodZ leads to cell elongation and thickening<sup>30, 31, 34</sup>. We  
213 cloned the above-mentioned genes into pBLADE and transformed each into MG1655  
214 *E. coli* cells. We then exposed the cells to 4 hours of blue light illumination. Cells kept  
215 in the dark served as controls. BLADE-induced MinD<sup>Δ10</sup> overexpression led to the  
216 formation of minicells; cells kept in the dark were indistinguishable from those  
217 transformed with an empty pBLADE, which served as negative control (Fig. 3b, c).  
218 The phenotype was not caused by the illumination (Fig. 3c). In contrast to MinD<sup>Δ10</sup>  
219 overexpression, BLADE-induced MreB and RodZ overexpression led to cell  
220 elongation and thickening, while cells kept in the dark were indistinguishable from the  
221 negative control (Fig. 3d-f). We additionally controlled endogenous RodZ with  
222 BLADE using a previously constructed strain (KC717), where the endogenous  
223 promoter driving *rodZ* expression has been exchanged with P<sub>BAD</sub><sup>7</sup>. In the absence of  
224 arabinose, the endogenous chromosomal copy of AraC inhibits transcription from P<sub>BAD</sub>,  
225 thus RodZ is not expressed and cells are spherical<sup>7, 31, 32, 35</sup>. In the presence of arabinose,  
226 endogenous AraC initiates transcription from P<sub>BAD</sub> and, consequently, RodZ is

227 expressed, leading to the reappearance of rod-shaped cells<sup>7</sup>. We transformed KC717  
228 cells either with pBLADE-RodZ (population A) or with an empty pBAD33 deprived  
229 of *araC* and P<sub>BAD</sub> (pBAD#; population B) and kept both populations either uninduced  
230 (in the dark for population A, and without arabinose for population B) or induced them  
231 for 4 hours (with blue light for population A and with arabinose for population B) (Fig.  
232 3g). At this time point, population A recovered the rod-shape to a greater extent than  
233 population B (Fig. 3h). To showcase the power of optogenetics to quickly switch  
234 induction off, we subjected the cells to a recovery phase, by putting them into the dark  
235 (population A) and washing arabinose off (population B). While it was possible to  
236 obtain spherical cells again after 2 hours of dark incubation, the cells that had been  
237 induced with arabinose did not recover the initial phenotype and rather became even  
238 more rod-shaped (Fig. 3h).

239

#### 240 **Characterization of *E. coli* genes with unknown function in terms of intracellular** 241 **localization and effect on growth and morphology**

242 The *E. coli* genome contains 4623 genes, 35% of which currently lack experimental  
243 evidence of function<sup>36</sup>. Since light is particularly well-suited for medium to high-  
244 throughput studies due to its low cost, scalability, and effortless application, we used  
245 BLADE to characterize some of these genes in terms of their intracellular localization  
246 and effect on cell growth and morphology. We randomly selected 34 completely  
247 uncharacterized genes and included 5 additional genes, for which some information  
248 was available: *ydaT*, which was shown to lead to cell elongation and reduced survival  
249 when overexpressed in *E. coli*<sup>37</sup>; *ydiY*, which was shown to be induced by acid and was  
250 predicted to be an outer membrane protein<sup>38</sup>; *ycbK* (renamed MepK), which was shown  
251 to be a murein hydrolase involved in cell wall synthesis<sup>39</sup>; *yehS*, whose downregulation

252 has been shown to improve the growth of *E. coli* in n-butanol and n-hexane<sup>40</sup>; and *yebE*,  
253 which was shown to be induced by copper in a CpxA/CpxR-dependent manner<sup>41</sup>, and  
254 was predicted to be localized to the inner membrane<sup>42</sup>. Importantly, fluorescence  
255 microscopy-based localization studies have not been so far carried out for any of these  
256 39 genes. Since fusion to a fluorescent protein (FP) could alter or impair the function  
257 of the gene products, we cloned each of the 39 genes in native form into pBLADE (Fig.  
258 4a). However, in order to monitor the localization of the gene products in *E. coli* cells,  
259 we additionally cloned for each gene N- and C-terminal fusions to sfGFP (Fig. 4a). We  
260 tested both termini because it is known that the terminus at which the FP is fused often  
261 plays a role in determining whether the fusion protein maintains the same localization  
262 as the native one<sup>43-45</sup>. In total, we constructed a library of 117 plasmids. Those bearing  
263 the native genes were subjected to growth assays and differential interference contrast  
264 (DIC) microscopy, while those bearing the fusions to sfGFP were subjected to  
265 fluorescence microscopy (Fig. 4a). Before performing experiments, we applied  
266 bioinformatics and computational structural biology approaches to predict the function  
267 and localization of the 39 selected genes (Fig. 4a). We used three different tools  
268 (Argot2.5<sup>46</sup>, PANNZER2<sup>47</sup>, and DeepGoPlus<sup>48</sup>) that predict protein function and  
269 localization from amino acid sequence information only and one protein 3D modeling  
270 tool (Phyre2<sup>49</sup>) that uses this information as well as secondary structure prediction to  
271 find a template structure that best represents the submitted protein for 3D modeling  
272 (Supplementary Table 1). We generated a consensus table for localization and function  
273 taking the predictions shared by at least two out of the four methods (Supplementary  
274 Table 2). A consensus was found for 14 out of 39 genes for functional prediction and  
275 for 21 out of 39 for localization prediction. We first analyzed the effect of  
276 overexpressing the native proteins on bacterial growth. We found six genes whose

277 products significantly affected the growth of MG1655 cells: three positively (*yahC*,  
278 *yebE* and *yebY*) and three negatively (*yhhM*, *yjeO* and *ypaB*; Fig. 4b and Supplementary  
279 Fig. 7a). Interestingly, *yebY* is predicted to have transaminase activity (Supplementary  
280 Table 2), which could explain why cells overexpressing it grow faster. To assess if any  
281 of the 39 genes caused morphological changes, we performed DIC microscopy on  
282 MG1655 cells exposed to light for 4 hours. While most genes did not cause  
283 morphological alterations, two led to cell elongation (*ydaT* and *ydhL*) and one to cell  
284 lysis (*yhcF*; Fig. 4c). Our results thus confirm previous observations on the effect of  
285 *ydaT* overexpression on cell morphology<sup>37</sup>, and further indicate that *ydhL* may be  
286 involved in cell division. Since *ydcF* overexpression caused cell death in this assay, we  
287 additionally measured the OD<sub>600</sub> of the cell culture after 4 hours of growth in the  
288 incubator and found that it was indeed reduced compared to that of the cultures  
289 overexpressing *ydaT* and *ydhL* as well as compared to cells transformed with empty  
290 pBLADE (Supplementary Fig. 7b). Notably, *yhcF* did not cause growth defects in the  
291 assay performed in the 96-well plate. However, it is known that bacteria grow slower  
292 in a 96-well plate than in a flask, due to the lower oxygen exchange and shaking.  
293 Therefore, it cannot be excluded that the 6 genes found to affect growth in the 96 well-  
294 plate assay form only a partial list, and that other genes among the selected 39 may also  
295 affect *E. coli* growth when overexpressed.

296 To study the localization of the uncharacterized genes, we performed fluorescence  
297 microscopy. As expected, not all gene products tolerated fusions to either terminus  
298 (Supplementary Table 2). For some, fluorescence was barely detectable for one of the  
299 two fusions, and for others the localization was not the same for both fusions  
300 (Supplementary Fig. 8a, b and Supplementary Table 2). All in all, we found 3 genes  
301 whose products co-localized with the nucleoid, 14 that co-localized to the cytoplasmic



302 membrane, and 26 that formed foci (Fig. 4d). While the localization alone is not  
303 sufficient to reveal the function of the 39 genes, it gives important information and, for  
304 some of the genes, suggests a potential mechanism of action. For instance, *ydaT*, which  
305 is reported to be a toxin<sup>37</sup>, may exert this function by binding and inhibiting DNA  
306 gyrase, since we found it co-localized on the nucleoid. Other toxins that inhibit DNA  
307 gyrase and co-localize to the nucleoid have been described<sup>50, 51</sup>.

308

309 **The mechanism of BLADE-mediated blue light-inducible gene expression involves**  
310 **the formation of intracellular protein aggregates in the dark**

311 Wild type AraC and BLADE are substantially different in their mode of action: AraC  
312 is always a dimer that, in the absence of arabinose, binds the I<sub>1</sub> and O<sub>2</sub> half-sites and,  
313 in the presence of the sugar, binds the I<sub>1</sub> and I<sub>2</sub> half-sites (Fig. 1a). In contrast, BLADE  
314 is monomeric in the dark and dimeric under blue light illumination (Fig. 5a). It is hard  
315 to predict the 3D structure of the light-induced BLADE dimer. In principle, dimeric  
316 BLADE could assume a conformation resembling either that of the AraC dimer free of  
317 arabinose, or that of the arabinose-bound dimer, or even a different conformation not  
318 found in the natural protein that would nonetheless favor interaction with I<sub>1</sub> and I<sub>2</sub>. All  
319 the data we obtained strongly suggest that dimeric BLADE preferentially assumes a  
320 conformation that leads to its interaction with the I<sub>1</sub> and I<sub>2</sub> half-sites. In particular, the  
321 increase in reporter gene expression after illumination can be explained only if BLADE  
322 contacts the I<sub>2</sub> half-site and recruits the RNA polymerase at the P<sub>BAD</sub> promoter. The I<sub>1</sub>  
323 half-site is likely contacted also by monomeric BLADE, given that a single DBD of  
324 AraC was shown to bind to it *in vitro*<sup>12</sup>. However, this is not sufficient for recruiting  
325 the RNA polymerase to the P<sub>BAD</sub> promoter<sup>52</sup>. To further prove that the I<sub>2</sub> half-site is

326 contacted *in vivo* by BLADE in the presence of blue light, we constructed a modified  
327 pBLADE plasmid, in which the I<sub>2</sub> half-site was cloned in inverse orientation, while  
328 keeping the -35 region of the P<sub>BAD</sub> promoter untouched (Supplementary Fig. 9a). In this  
329 case, there was no significant difference in mCherry levels between dark and light  
330 samples (Supplementary Fig. 9b).

331 In *Neurospora crassa*, the organism in which it is naturally expressed, VVD is actually  
332 degraded in the dark<sup>53-55</sup>. We asked whether VVD may trigger the degradation of  
333 BLADE in *E. coli* cells in the dark, which could add another layer of regulation to the  
334 system and contribute to its tightness. To address this question, we fused sfGFP to the  
335 C-terminus of BLADE to avoid any interference with dimerization and performed flow  
336 cytometry to measure BLADE levels in cells kept in the dark and exposed to blue light  
337 for 4 hours. The sfGFP levels were comparable in both conditions (Fig. 5b). However,  
338 fluorescence microscopy revealed the presence of bright fluorescent foci in half of the  
339 cells kept in the dark (Fig. 5c and Supplementary Fig. 9c), while less than 20% of the  
340 illuminated cells showed foci (Fig. 5d and Supplementary Fig. 9c). To investigate the  
341 nature of the foci, we performed fluorescence recovery after photobleaching (FRAP)  
342 experiments and found the foci to be static (Supplementary Fig. 9d), suggesting they  
343 are aggregates rather than functional liquid droplets. It has been previously shown that  
344 VVD transitions between locally unfolded and folded states and that light shifts the  
345 half-life of the transition from about 5 minutes to 6 hours<sup>56</sup>. It was suggested that  
346 simultaneous unfolding of several structural elements of VVD could lead to  
347 aggregation in the dark<sup>56</sup>. The aggregates we observed in *E. coli* could, therefore, be  
348 due to the VVD moiety in BLADE. To prove that the aggregates are related to the light  
349 response of VVD, we mutated the adduct-forming cysteine to alanine (VVD<sup>C108A</sup>)  
350 within BLADE. We expected the mutant to show aggregates also under blue light

351 illumination, since VVD<sup>C108A</sup> is not responsive to light. Indeed 40% of the cells  
352 presented aggregates both in the dark and when illuminated with blue light for 4 hours  
353 (Fig. 5e and Supplementary Fig. 9c).

354 Finally, to investigate whether light leads to the dispersion of previously formed foci,  
355 we performed time-lapse fluorescence microscopy to follow individual foci over time  
356 in illuminated cells. If light actively disperses the aggregates, foci in individual cells  
357 should disappear. Alternatively, the aggregates may remain intact under blue light  
358 illumination, but form less frequently in newborn cells. We found that the aggregates  
359 do not disperse, but are instead asymmetrically segregated during cell division  
360 (Supplementary Video 2). Newborn cells contain either no foci or foci much smaller  
361 than those found in cells kept in the dark (Supplementary Video 2).

362

### 363 **Expanding the family of BLADE TFs**

364 In principle, BLADE could have been designed using other light-inducible dimerization  
365 domains. Moreover, the position of this domain with respect to the DBD of AraC may  
366 not need to reflect that found in the wild type protein. To test if other functional  
367 combinations with different characteristics could be identified, we generated a much  
368 larger set of samples for characterization, with a library size significantly larger than  
369 the one described earlier. As a light-inducible dimerization unit, we included not only  
370 VVD, but also the Light Oxygen Voltage (LOV) domain of *Vaucheria frigida*  
371 Aureochrome1 (VfAu1)<sup>57, 58</sup>, which is naturally found C-terminally to a bZip DBD<sup>58</sup>,  
372 and which, like VVD, homodimerizes upon blue light stimulation<sup>59, 60</sup>. To assess the  
373 functionality of the chimeric transcription factors (cTFs), we used only the P<sub>BAD</sub>

374 promoter (I<sub>1</sub>-I<sub>2</sub> half-sites) and removed the upstream regulatory elements (O<sub>1</sub> and O<sub>2</sub>  
375 half-sites)<sup>61</sup>. Since the results with the initial VVD-AraC fusions showed that the  
376 strength of the constitutive promoter driving their expression played an important role  
377 in determining the light/dark fold change (Fig. 1f), we systematically explored how the  
378 expression levels of the cTF affected mCherry levels in the dark and after blue light  
379 illumination. To this aim, we first used an isopropyl-β-D-thiogalactopyranoside  
380 (IPTG)-inducible promoter<sup>62</sup> to achieve various levels of expression of the cTF, with  
381 the goal of finding the most appropriate expression level. This identification of  
382 appropriate or ‘optimal’ cTF expression levels to achieve a certain output (e.g. highest  
383 fold change, or certain levels of dark or light-induced expression) is the first step in our  
384 2-step method (Fig. 6a). For this, an IPTG-inducible promoter is used to cover a wide  
385 range of cTF concentrations—a step that only requires a single genetic construct. The  
386 second step maps the transcriptional strength of the IPTG induction levels to  
387 constitutive promoters. This step only needs to be performed once for a given inducible  
388 promoter. Using constitutive promoters allows for future uses of the optimized systems  
389 and eliminates the need for inducer molecules. We employed the IPTG-inducible  
390 promoter as part of single-plasmid systems that can be assembled in one-pot Golden  
391 Gate cloning reactions comprised of easily adaptable components. This allows for the  
392 characterization of these and other cTFs by enabling the exchange of every functional  
393 genetic component (Supplementary Fig. 10). In principle, one may expect that different  
394 possible scenarios could arise from the influence of the cTF concentration on the output  
395 expression (Supplementary Fig. 11). For example, Scenario 1 represents the case in  
396 which the higher the cTF concentration, the higher the output will be, both in the dark  
397 and after illumination, maintaining the fold change relatively constant. Scenario 2  
398 represents the case in which a concentration threshold exists, after which there is a

399 reduction in the light-induced fold change of the output. This effect could be due, for  
400 example, to resource limitations in the cells that express the cTF and the output gene.  
401 Scenario 3 corresponds to a different effect—one that also implies the existence of  
402 optimal intermediate cTF concentrations. Here, high cTF concentrations do not alter  
403 the output expression in the light, but they instead cause the dark state to increase, for  
404 instance due to the formation of dimers in the dark. We used a wide range of inducer  
405 concentrations to capture these potential scenarios, and focused on the output light/dark  
406 fold change, an important feature of light-inducible proteins. Depending on the  
407 application, other properties such as high output expression or low dark state might be  
408 more relevant. To characterize many individual samples, under the same light input  
409 conditions, a novel high-throughput light induction device was needed. We therefore  
410 developed a light induction device which can be used for standard 96-well microtiter  
411 plates in which the light input for every well can be steered individually (Fig. 6b). The  
412 setup comprises a custom-made printed circuit board (PCB) with 96 individual light  
413 emitting diodes (LEDs) of three different wavelengths (red, green and blue). Each LED  
414 can be controlled individually using a microcontroller, enabling the exposure of each  
415 well to the same light intensity, a crucial aspect for the characterization of the cTFs. A  
416 milled metal plate placed in between the PCB and the LEDs dissipates the heat  
417 produced by the light induction device. A 3D-printed microplate adapter on top of the  
418 metal plate allows for the precise positioning of the 96-well plate. The high-throughput  
419 characterization allowed us to calculate IPTG dose-response curves of the same  
420 construct receiving the same light input as well as grown in the dark (Fig. 6a). In  
421 addition, it allowed us to test the N- and C-terminal positioning of the light-inducible  
422 dimerization unit, as well as different linkers connecting the two domains, which would  
423 not have been feasible without this technical setup (Fig. 6c).

424 For this characterization we used *E. coli* strain BW25113  $\Delta$ *araC* from the KEIO  
425 collection<sup>63</sup>, and integrated *lacYAI77C* into the *attB* site for facilitated IPTG  
426 diffusion<sup>30</sup>. We first tested the constructs in the library with variable order between  
427 AraC<sub>DBD</sub> and the light-inducible dimerization unit, but constant linker. Our 96-well  
428 light induction setup allowed us to use a wide range of IPTG concentrations, from no  
429 induction to a concentration of 2 mM IPTG. For all constructs, the highest fold change  
430 was reached at intermediate mCherry expression levels (indicated with red lines in two  
431 examples shown in Fig. 6d). Placing AraC<sub>DBD</sub> at the C-terminus led to higher fold  
432 changes for VVD-based constructs, mainly due to lower mCherry expression in the  
433 dark (Fig. 6e). For VfAu1, the opposite was true (Fig. 6f). Next, we investigated the  
434 effect of linker length on the cTFs. Based on the results obtained with the first library,  
435 we placed AraC<sub>DBD</sub> C-terminally for the VVD-based constructs, and N-terminally for  
436 those based on VfAu1. We selected a set of linkers from a previous report<sup>64</sup>.  
437 Additionally, we cloned a linker-free variant for each of the dimerization domains,  
438 where the domains were directly fused with each other. We found that linker lengths  
439 from zero to 7 amino acids gave rise to the highest fold change for both photosensors  
440 (Fig. 6g, h). All these functional fusions expand the family of BLADE TFs.

441 Since in future biological applications BLADE should be constitutively expressed to  
442 dispense of the use of any chemical inducer, as was the case in our initial experiments,  
443 we aimed to find constitutive promoters that would give rise to expression levels  
444 comparable to those obtained with various IPTG concentrations. We therefore cloned  
445 in the same plasmid bearing the IPTG-inducible promoter a library of constitutive  
446 promoters<sup>65</sup>, as well as an additional weaker constitutive promoter variant to cover very  
447 low expression levels. To minimize the potential influence of individual promoters on  
448 mRNA transcription and translation initiation, we used a ribosome binding site (RBS)

449 containing an insulating ribozyme (RiboJ)<sup>66</sup>. Plotting the mCherry fluorescence levels  
450 obtained with the constitutive promoters and with the IPTG-inducible promoter at  
451 different IPTG concentrations in the same plot, it is possible to find the constitutive  
452 promoter that best matches the expression from the IPTG-inducible one at the desired  
453 IPTG concentration (Fig. 6a). While the characterization was performed in an *E. coli*  
454 strain in which the arabinose operon was deleted, the results do not change if a strain  
455 with endogenous *araC* is used (Supplementary Fig. 12).

456

457 **A synthetic P<sub>BAD</sub> promoter comprising two I<sub>1</sub> half-sites is light-inducible and**  
458 **achieves higher light/dark fold changes**

459 We performed the same systematic characterization of BLADE family members using  
460 a synthetic P<sub>BAD</sub> promoter, where the weak affinity I<sub>2</sub> half-site was exchanged with a  
461 second copy of the high affinity I<sub>1</sub> half-site (Supplementary Fig. 13). This synthetic  
462 promoter is insensitive to arabinose, as it is constitutively active when used with wild  
463 type AraC<sup>67</sup>. We asked whether it could be made light-inducible instead. Results with  
464 this promoter were consistent with those obtained with the synthetic P<sub>BAD</sub> promoter  
465 consisting only of the I<sub>1</sub> and I<sub>2</sub> half-sites (Fig. 6j, k), confirming our findings regarding  
466 the position of the domains and the linkers within the cTFs. Interestingly, the maximal  
467 dark/light fold change for the same cTFs was higher compared to that obtained with the  
468 I<sub>1</sub>-I<sub>2</sub> synthetic promoter. High IPTG concentrations led to toxic amounts of mCherry  
469 expression and were, therefore, indistinguishable for dark and light induction in most  
470 cases. Careful adjustment of the cTF concentration is required to achieve the desired  
471 light inducibility, which then unlocks an expression system with an even higher  
472 expression level and fold change than the one based on the original I<sub>1</sub> and I<sub>2</sub> half-sites.

## 473 **Discussion**

474 AraC is among the best studied bacterial transcriptional regulators, and the P<sub>BAD</sub>  
475 promoter is one of the inducible promoters most often employed in microbiology and  
476 synthetic biology. We have developed an entire family of AraC-derived TFs, which we  
477 call BLADE, that activate transcription from the P<sub>BAD</sub> promoter in response to blue  
478 light instead of arabinose. BLADE TFs are compatible with previously constructed  
479 strains carrying the P<sub>BAD</sub> promoter at an endogenous locus to drive the expression of a  
480 gene of interest, allowing microbiologists to readily perform optogenetic experiments  
481 without the need to construct anything new – transformation of the strain with pBLADE  
482 is the only requirement. Moreover, since we constructed pBLADE using pBAD33 as  
483 template (Supplementary Fig. 2a), microbiologists who wish to implement optogenetic  
484 control of their gene of interest can simply re-clone it into pBLADE using the same  
485 restriction enzymes previously employed with pBAD33. Another advantage is that the  
486 resistance cassette and origin of replication of pBLADE are identical to those of  
487 pBAD33, thus ensuring compatibility with other previously constructed plasmids that  
488 should be co-transformed with pBLADE. We additionally envisage that a plasmid  
489 carrying BLADE under a constitutive promoter may be combined with previously  
490 constructed arabinose-inducible plasmids as long as the origin of replications and  
491 resistances are compatible. This strategy would require no cloning and guarantee full  
492 compatibility with established plasmids.

493

494 While many other light-inducible TFs have been developed to date<sup>61, 68-72</sup>, some of  
495 which featuring extremely high dark/light fold changes<sup>61, 72</sup>, we explicitly aimed to  
496 engineer a system based on a well-known and pervasive TF (namely AraC) that is  
497 particularly suited for microbiological applications, thus stimulating the use of



498 optogenetics in microbiology. We took special care to engineer BLADE with minimal  
499 leakiness. Often, leakiness has been assessed by comparing the levels of reporter  
500 expression in the dark to those in the light. However, this does not take into account  
501 whether the expression in the dark state is already too high compared to the expression  
502 in the absence of the TF. Therefore, in the case of BLADE, minimal leakiness was  
503 demonstrated by comparing its activity in the dark with expression obtained with the  
504 same plasmid deprived of the TF (Fig. 1f-i and Supplementary Fig. 2b). We put BLADE  
505 to the test by expressing several functional *E. coli* proteins whose overexpression  
506 causes morphological changes to the cells and showed that, in the dark, cells are  
507 indistinguishable from the control (Fig. 3).

508

509 Light can be easily switched on and off. We showed that BLADE allows controlling a  
510 phenotype in a fully reversible manner, using rod shape as an example (Fig. 3g, h). In  
511 contrast to the fast reversibility achievable with pBLADE, the chemical inducer  
512 arabinose, even after being washed off, remained inside the cells, committing them to  
513 become even more rod-shaped instead of going back to the spherical morphology.  
514 Moreover, light could be locally applied to create mixed populations to directly  
515 compared the effects of morphology on the fitness of cells in different environments.

516 Another key feature of BLADE is that its leads to a homogenous response in a cell  
517 population (Supplementary Fig. 3), in contrast to the heterogenous activation of P<sub>BAD</sub><sup>73</sup>.

518 While heterogeneity can be overcome by overexpression of either the arabinose  
519 transporter AraE<sup>74</sup> or LacY<sup>75</sup>, a transporter with relaxed specificity, the usage of the  
520 promoter is then limited to these engineered strains or requires co-transformation with  
521 a plasmid encoding the transporter.

522 To showcase the utility of light induction in medium to high-throughput studies, we  
523 used BLADE to overexpress 39 genes randomly selected from those with unknown or  
524 poorly defined function. We applied four bioinformatic tools to predict their function  
525 and localization. While it was possible to find a consensus prediction for 53% of the  
526 genes in case of localization, only for 35% of the genes was a consensus found for  
527 function prediction. Even in this case, the prediction remained relatively vague (ligase,  
528 transporter, DNA binder, etc.; see Supplementary Table 1). This highlights how  
529 computer-based predictions cannot yet replace detailed biochemical characterization,  
530 which remains essential to assign a function to a protein.

531 Previous reports on light-inducible TFs based on VVD have employed untagged  
532 versions, since the scope was to quantify the reporter gene expression output<sup>5, 6, 14, 72</sup>.  
533 We also did not include any FP in the BLADE construct at the beginning, since  
534 visualization of BLADE localization was not important and the fusion may have not  
535 been as active as the untagged version. It was, thus, surprising to see that BLADE is  
536 not simply cytoplasmic as it may be expected (Fig. 5c). Formation of aggregates in the  
537 dark is in good accordance with previous studies<sup>56, 76</sup>. While we did not analyze VVD  
538 alone, we speculate that the aggregates reflect a property of VVD, not AraC<sub>DBD</sub>.  
539 Evidence in this respect comes from the results with BLADE bearing a mutated VVD  
540 (VVD<sup>C108A</sup>), which is insensitive to light and forms aggregates also under blue light  
541 illumination (Fig. 5d). While in *N. crassa* VVD is degraded in the dark, in *E. coli* the  
542 protein forms aggregates, which may effectively have an impact similar to degradation  
543 in its rendering the protein inactive. The advantage of inactivation by sequestration  
544 rather than degradation is that the protein can be quickly released from the aggregates  
545 and activated when needed, without the delay that would result from a novel round of  
546 gene expression. To date, many proteins have been shown to localize to intracellular

547 bodies, however, often it is not clear if they constitute functional entities, such as liquid  
548 droplets, storage bodies or aggregates<sup>77</sup>. For the protein stored in the aggregates to be  
549 quickly activated, its association with these aggregates should be dynamic. When  
550 followed over time in time-lapse microscopy, we found that the aggregates formed by  
551 BLADE in the dark did not disperse in the same cell once it was illuminated with blue  
552 light (Supplementary Video 2). The aggregates were polarly localized and  
553 asymmetrically segregated to only one of the daughter cells (Supplementary Video 2).  
554 This is in line with a previous report on asymmetric segregation of protein aggregates  
555 in *E. coli*<sup>78</sup>. These data suggest that the foci formed by BLADE are indeed  
556 dysfunctional aggregates and that, when cells are illuminated, the probability of their  
557 *de novo* formation strongly decreases. Notably, the aggregates cannot be the only  
558 mechanism in place that controls the activation of the P<sub>BAD</sub> promoter by BLADE, since  
559 we found them only in about half of the cells (Supplementary Fig. 9c). We believe they  
560 add a layer of regulation to the system, contributing to its tightness. However, the  
561 mechanism of BLADE-mediated gene expression involves dimer formation and  
562 consequent occupancy of the I<sub>2</sub> half-site, which recruits the RNA polymerase.

563

564 When engineering new TFs, we found that not only is an appropriate protein  
565 engineering approach necessary, but also that the adjustment of the TF concentration is  
566 critical if we wish to achieve optimal functionality. While this is intuitive for low TF  
567 concentrations that might be insufficient to generate a biological response, we also  
568 found that, if concentrations exceed certain levels, the functionality of the TF may  
569 deteriorate (Fig. 6d) or disappear altogether (Fig. 6i). For the selected metric of  
570 light/dark fold change, intermediate TF expression levels always led to the highest, and  
571 hence the most optimal, values. Our high-throughput approach and novel 96-well light

572 induction device made this possible. By calibrating the IPTG dose-response of an  
573 inducible promoter to a large set of constitutive promoters, the desired TF expression  
574 levels can be fixed, dispensing the need for an inducer (Fig. 6a). This mapping is  
575 essential, because it dramatically reduces the experimental demand for cloning of  
576 constructs, as only one construct needs to be cloned per TF. While this approach holds  
577 great promise for the optimization and development optogenetic systems, as  
578 demonstrated here, we expect that it will also be useful for the development of other  
579 transcriptional regulators as well as for systematically bringing the expression levels of  
580 various components in biological circuits to their optimal levels.

581

582 In this article we have demonstrated several features enabled by light induction,  
583 including reversibility, which opens up the possibility of using dynamic inputs for  
584 probing biological phenomena. In particular, pulsatile inputs that alternate between  
585 dark (OFF) and maximum intensity (fully ON) can be used to achieve effects that  
586 cannot be realized with graded intensity light. For example, it has been shown that  
587 pulsatile inputs lead to reduced cell-to-cell variability in gene expression<sup>79</sup>. In fact, by  
588 adjusting the duty-cycle (defined as the fraction of the time that the light is fully ON),  
589 one can even tune the amount of cell-to-cell variability, providing a new control  
590 modality for exploring cell-to-cell variability and stochastic gene expression. This type  
591 of pulsatile input was also recently shown to enhance the biosynthesis of products in  
592 engineered cells, enabling a new manner of bioreactor operation in which enzyme  
593 expression is tuned to increase fermentation yield<sup>80</sup>.

594

595 Taken together, the features of BLADE, its ease of adoption and usage, and its low  
596 cost should bring the many benefits of optogenetic manipulation to the field of  
597 microbiology, enabling new and exciting discoveries.

598

## 599 **Methods**

600 **Strains, media and reagents.** The strains used in this study are listed in Supplementary  
601 Table 3. For experiments shown in Figures 1, 3-5, and Supplementary Figures 3, 4, 5  
602 and 8, the cultures were grown in autoclaved Tryptone Broth (TB; 10 g l<sup>-1</sup> Tryptone, 5  
603 g l<sup>-1</sup> NaCl, 1 mM NaOH). For the bacterial photography experiments shown in Figure  
604 2, and Supplementary Figure 7, the cultures were grown in autoclaved LB-Miller  
605 medium. For experiments shown in Figure 6 and Supplementary Figures 12, 14-17, the  
606 cultures were grown in autoclaved LB-Miller medium for strain propagation and in  
607 sterile-filtered M9 medium supplemented with 0.2% casamino acids, 0.4% glucose,  
608 0.001% thiamine, 0.00006% ferric citrate, 0.1 mM calcium chloride, 1 mM magnesium  
609 sulfate for all gene expression experiments. In experiments in which the plasmid had to  
610 be maintained, the medium was supplemented with 34 µg ml<sup>-1</sup> chloramphenicol  
611 (Sigma-Aldrich Chemie GmbH). IPTG, rifampicin and doxycycline were purchased  
612 from Sigma-Aldrich Chemie GmbH.

613

614 **Constructions of strains and plasmids.** To integrate *lacYAI77C* into the *attB* site of  
615 BW25113<sup>63, 81</sup> we used  $\lambda$  integrase expressed from pJW27 using plasmid pSKA27  
616 containing *lacYAI77C*, FRT-flanked *kanR* from pKD13 ligated into XbaI-cut pFL503<sup>82</sup>  
617 and a sequence identical to the genome regions for *attB* integration. pSKA27 was cut  
618 with NotI, and the 4229 bp band gel was purified and circularized before transformation  
619 into pJW27-containing cells. For integration, pJW27 was transformed into *E. coli*

620 BW25113 and selected at 30°C on LB-Agar plates containing chloramphenicol for  
621 expression of  $\lambda$  integrase. A single colony was used to inoculate 5 ml of LB broth  
622 containing chloramphenicol, and the culture was grown at 30°C in a water bath with  
623 shaking. The cells were then moved to 42°C for 15 min, before incubating on ice for  
624 15 min. Cells were transformed with the integration construct using the previously  
625 described transformation protocol. The fusion VVD-AraC proteins FP1-5 were first  
626 subcloned into pDK12<sup>83</sup> using the NcoI and NotI restriction sites. The *vvd* gene carrying  
627 the N56K and C71V mutations and coding for a VVD protein missing the first 36 amino  
628 acids was PCR-amplified out of plasmid pGAVPO (gift from Yi Yang; East China  
629 University of Science and Technology). The *araC* fragments were amplified from  
630 pBAD33. To clone the fusions, a two-step protocol was followed. In the first step, the  
631 two parts were separately PCR-amplified. After the purification of the PCR products,  
632 the two fragments were fused together in the second PCR step, and then cloned into  
633 pDK12 with NcoI and NotI restriction enzymes, yielding plasmids pDK12(FP1-5).  
634 Next, the DNA sequences coding for the fusion proteins FP1-FP5 were PCR-amplified  
635 using primers 15 and 16 and cloned into pBAD33 (previously deprived of AraC via  
636 PCR using primers 13 and 14, yielding the negative control plasmid pBLADE-empty)  
637 linearized with ClaI. The J23101 promoter was included in the forward primer. The  
638 obtained pBAD33-derived plasmids are called pBLADE(FP1-5). The *mCherry* gene  
639 codon-optimized for expression in *E. coli* was synthesized (IDT) and cloned into  
640 pBLADE with SacI and HindIII restriction enzymes. We subsequently generated  
641 pBLADE(FP7)-mCherry by inserting an additional GS linker between VVD and AraC  
642 with a site-directed mutagenesis protocol using pBLADE(FP4)-mCherry as template  
643 with primers 17 and 18. The primers, designed with the QuikChange Primer Design  
644 website, were used to amplify the plasmid. The PCR reactions contained 8% of DMSO

645 to allow proper annealing of the primers to the template DNA. Similarly,  
646 pBLADE(FP6)-mCherry was generated by removal of the GS linker from the same  
647 template with the same protocol previously described, using primers 19 and 20. To  
648 construct the positive control with full-length AraC, pBLADE was linearized with ClaI,  
649 the *araC* gene was PCR-amplified with primers 21 and 22 and then cloned into the  
650 backbone, yielding pBLADE(AraC<sub>WT</sub>)-mCherry. The mutations and deletions leading  
651 to promoters J23101\* and J23101\*\* (Supplementary Figure 1) generated  
652 spontaneously during growth of bacterial cultures transformed with pBLADE(FP4)-  
653 mCherry. These promoters have been subsequently cloned in all other pBLADE  
654 plasmids by PCR-amplification with primers 23 and 24. The backbones were PCR  
655 amplified with primers 25 and 26, yielding pBLADE(FP1\*/FP7\*)-mCherry and  
656 pBLADE(FP1\*\*/FP7\*\*)-mCherry. The promoters were cloned into  
657 pBLADE(AraC<sub>WT</sub>)-mCherry by overlapping PCR starting from pBLADE(AraC<sub>WT</sub>)-  
658 mCherry as template with primers 27 and 28, yielding pBLADE(AraC<sub>WT</sub>\*/AraC<sub>WT</sub>\*\*)-  
659 mCherry. The DNA sequence coding for eYFP-MinD was PCR-amplified out of pSR-  
660 4<sup>84</sup> with primers 31 and 32 and cloned into pBLADE(FP6\*) via Gibson Assembly after  
661 having amplified the backbone (pBLADE(FP6\*)-mCherry) with primers 33 and 34.  
662 The *sfgfp* gene was PCR-amplified with primers 35 and 36 from plasmid pHR-scFv-  
663 GCN4-sfGFP-GB1-NLS-dwPRE (gift from Ron Vale; Addgene plasmid # 60906;  
664 <http://n2t.net/addgene:60906>; RRID:Addgene\_60906) and cloned in pBLADE(FP6\*)-  
665 mCherry via Gibson Assembly after amplification of the backbone with primers 37 and  
666 38, yielding pBLADE(FP6\*)-sfGFP. The DNA sequence coding for MinD<sup>Δ10</sup> was  
667 amplified out of pBDV-13<sup>18</sup> with primers 39 and 40 and cloned via Gibson Assembly  
668 into pBLADE(FP4\*\*)-mCherry previously amplified with primers 41 and 42. The *rodZ*  
669 and *mreB* genes were PCR-amplified from genomic DNA isolated from *E. coli*

670 MG1655 using primers 43 and 44 and 45 and 46 respectively. Cloning into  
671 pBLADE(FP4\*\*) was achieved via Gibson Assembly after amplification of the  
672 plasmid backbone with primers 33 and 34. pBAD# (pBAD33 deprived of the P<sub>BAD</sub>  
673 promoter and mCherry) was cloned via Gibson Assembly by amplification of  
674 pBLADE(FP6\*\*)-mCherry with primers 47 and 48, digestion of the linearized plasmid  
675 with SacI and following ligation. The 39 genes with unknown or poorly defined  
676 function were PCR-amplified from genomic DNA isolated from *E. coli* MG1655 using  
677 the primer pairs listed in Supplementary Table 5. The backbone pBLADE(FP6\*\*) was  
678 amplified with primers 33 and 34 to insert the first 16 genes, and with primers 49 and  
679 50 to insert the others. These primers allow maintaining start and stop codon on the  
680 plasmid backbone. To create the library with the fusion to sfGFP, the first 16 genes in  
681 the list in Supplementary Table 1 were amplified with primers that included a GS linker  
682 at their N or C-terminus, and cloned in the backbone pBLADE(FP6\*\*)-sfGFP  
683 amplified with primers 33 and 51 (N-terminal fusions) and 52 and 34 (C-terminal  
684 fusions). For the remaining genes, primers 50 and 54 (N-terminal fusions) and 49 and  
685 53 (C-terminal fusions) were used. For protein purification, the BLADE FP6 construct  
686 was PCR-amplified with primers 55 and 56 from pBLADE(FP6\*)-mCherry and cloned  
687 into pET28a with BamHI and NotI restriction enzymes, yielding to pET28a-FP6. In  
688 order to invert the orientation of the I<sub>2</sub> half-site, the plasmid pBLADE(FP6\*)-mCherry  
689 was amplified with overlapping PCR with primers 57 and 58 generating the plasmid  
690 pBLADE\_I<sub>2</sub>rev\_(FP6\*)-mCherry. Note that the -35 region, partially overlapping the I<sub>2</sub>  
691 half-site, was not inverted. For the fusion of sfGFP to the C-terminal of BLADE FP6,  
692 pBLADE(FP6\*)-mCherry was amplified with primers 59 and 60, the *sfgfp* gene was  
693 amplified from pBLADE(FP6\*)-sfGFP with primers 61 and 62, that carried a GS  
694 linker. The cloning yielded to pBLADE((FP6-sfGFP\*)-mCherry. Gibson Assembly



695 was performed using NEBuilder® HiFi DNA Assembly (New England Biolabs). PCR  
696 were performed using the Phusion Flash High Fidelity PCR Master Mix (Thermo  
697 Scientific). Oligonucleotides were ordered at Sigma Aldrich.

698 To clone the extended library of BLADE TFs, we used a modular Golden Gate cloning  
699 strategy using an optimized junction set for part assembly taken from<sup>85</sup>. The overhangs  
700 as well as the individual parts and the final plasmid sequences are shown in  
701 Supplementary Table 6 as well as Supplementary Dataset 1. To invert the  
702 transcriptional unit containing the *mCherry* gene under AraC-controlled promoters, we  
703 first assembled the transcriptional unit separately, and then PCR-amplified the resulting  
704 fragment to create an A junction inverted at the end, and an F junction inverted at the  
705 beginning of the transcriptional unit and further treated the resulting construct as a part.

706 Individual parts were first cloned into a part vector using BbsI-HF. The final plasmids  
707 were assembled from individual parts with BsaI-HF for digestion of the parts, and BbsI-  
708 HF for digestion of the plasmid backbone, which contains a p15a and a  
709 chloramphenicol acetyl transferase. Plasmids were transformed using a one-step  
710 preparation protocol of competent *E. coli* cells for transformation of plasmids in testing  
711 strains<sup>86</sup>. The sequences of all cloned plasmids were confirmed by Sanger sequencing  
712 (Eurofins Genomics Europe Sequencing GmbH, Köln, Germany, and Microsynth AG,  
713 Balgach, Switzerland). A list of all vectors used and constructed in this study is shown  
714 in Supplementary Table 4 and Supplementary Dataset 1. Oligonucleotide sequences  
715 used for PCR amplification and Golden Gate part sequences are shown in  
716 Supplementary Tables 5 and 6. The cloning was performed using chemically competent  
717 *E. coli* TOP10 cells (Thermo Scientific).

718

719 **Bacterial growth.** For experiments shown in Figures 1-5 and Supplementary Figures  
720 2-9, cultures were handled under safe red light whenever containing light-sensitive  
721 constructs. The cultures were incubated overnight in TB or LB (Figure 2 and Figure 3  
722 g, h) medium and grown at 37°C (with the exception of cultures used for the  
723 experiments in Figure 4d and Supplementary Figure 8 which were grown at 18°C) in  
724 an incubator shaking at 250 rpm, in black plastic tube (Argos Technologies LiteSafe®  
725 15 ml) if containing light-sensitive samples, in transparent glass tubes otherwise (with  
726 the exception of cultures used for the experiments in Figure 4d and Supplementary  
727 Figure 8 which were shaken at 110 rpm). The following morning, the cultures were  
728 diluted to OD<sub>600</sub> 0.1 and let grow until OD<sub>600</sub> 0.4. Half of the culture was then  
729 transferred in transparent glass tubes and induced either with blue light or with  
730 arabinose for 4 hours (with the exception of cultures used for the experiments in Figure  
731 4d and Supplementary Figure 8 which were diluted 1:30). For experiments shown in  
732 Figure 6 and Supplementary Figures 12, and 14-17, cultures were grown in an  
733 environmental shaker. The shaking incubator consisted of a Kuhner ES-X shaking  
734 module (Adolf Kühner AG, Basel, Switzerland) mounted inside an aluminum housing  
735 (Tecan, Maennedorf, Switzerland) and temperature-controlled using an “Icecube” (Life  
736 imaging services, Basel, Switzerland). Cultures were grown at 37°C with shaking at  
737 300 rpm in black, clear-bottom 96-well plates (Cell Culture Microplates 96 Well  
738 µClear® CELLSTAR®, Greiner Bio-One GmbH, Product #: 655090), which were  
739 sealed with peelable foil (Sealing foil, clear peelable for PlateLoc, No. 16985-001,  
740 Agilent) to prevent liquid evaporation and guarantee sterility, as well as a plastic lid  
741 (Greiner Bio-One GmbH, Product #: 656171). Overnight cultures were inoculated in  
742 M9 medium and grown over night to an OD<sub>600</sub> of about 4. These cultures were diluted  
743 1:20,000 into fresh M9 medium containing the respective inducer concentrations, right

744 before the start of the experiment. This high dilution ensures that the cells are still in  
745 logarithmic growth phase after 5h, at the end of the experiment<sup>61</sup>. 200  $\mu\text{l}$  of inoculated  
746 culture were incubated per well in the 96-well plates. Cells were grown for 5h before  
747 transcription and translation was stopped with rifampicin and tetracycline<sup>61</sup>. The  
748 inhibition solution contained 500  $\mu\text{g ml}^{-1}$  rifampicin and 50  $\mu\text{g ml}^{-1}$  tetracycline in  
749 phosphate buffered saline (Sigma-Aldrich Chemie GmbH, Dulbecco's phosphate  
750 buffered saline) and was filtered using a 0.2  $\mu\text{m}$  syringe filter (Sartorius). 100  $\mu\text{l}$   
751 inhibition solution were aliquoted in 96-well U-bottom plates (Thermo Scientific  
752 Nunc), precooled on ice and samples were added in equal volumes (100  $\mu\text{l}$ ), resulting  
753 in a final inhibitor concentration of 250  $\mu\text{g ml}^{-1}$  rifampicin (Sigma-Aldrich Chemie  
754 GmbH) and 25  $\mu\text{g ml}^{-1}$  tetracycline (Sigma-Aldrich Chemie GmbH). After sample was  
755 added, the solution was incubated on ice for at least 30 min. Then mCherry maturation  
756 was carried out at 37 °C for 90 min. The samples were kept at 4°C until measurement  
757 through flow cytometry.

758

759 **Light illumination systems.** To illuminate the glass tubes in the shaker, six high-power  
760 460 nm LEDs type CREE XP-E D5-15 (LED-TECH.DE) were used (Supplementary  
761 Fig. 18). The LEDs were connected to a power supply (Manson HCS-3102) that  
762 allowed to tune the voltage, hence the light intensity. Unless specified, the light  
763 intensity reaching the cultures was 5  $\text{W/m}^2$  as measured with a LI-COR LI-250A Light  
764 Meter. For the bacterial photography and the induction of the library of genes with  
765 unknown or poorly defined function, we used a custom-made light box with, among  
766 others, 6 blue (455 nm) LEDs (Supplementary Fig. 19). To avoid generation of a  
767 blurred image in the bacteriograph, all the LEDs except for the one in the center were

768 obscured with colored tape. The average light intensity reaching the plate was  $5\text{W/m}^2$   
769 with 6 LEDs and  $1.3\text{W/m}^2$  with one LED.

770 The 96-LED array was designed using CircuitMaker 1.3.0 ([www.circuitmaker.com](http://www.circuitmaker.com)).

771 The LEDs (SK6812, Dongguang Opsco Optoelectronics Co., Dongguan City, China)

772 were arranged on the PCB at a pitch of 9 mm in an 8 x 12 grid to be compatible with

773 standard 96-well plates. All LEDs were daisy-chained using their DIN and DOUT

774 ports. A 0.1nF capacitor was placed in parallel to the VDD port of each LED as

775 proposed by the manufacturer. The 2-layer circuit was manufactured on a 1.6 mm thick

776 FR-4 substrate, and the surface of the PCBs was coated with black solder mask to

777 reduce reflection. The PCBs were ordered preassembled with the LEDs and 0.1 nF

778 capacitors ([www.pcbway.com](http://www.pcbway.com), Shenzhen, China). Every 96-LED PCB had one signal-

779 in and one signal-out SMA connector such that several 96-LED PCBs could be daisy-

780 chained using SMA cables and controlled by a single microcontroller. Up to 4x 96-

781 LED PCBs could be powered using a single Adafruit #658 5V 10A switching power

782 supply ([digkey.ch](http://digkey.ch), Munich, Germany) using a custom-made PCB to distribute the

783 power to several LED arrays. The LEDs were controlled through an Arduino Uno

784 microcontroller (Arduino, Somerville, MA, USA) using the fastLED library

785 (<http://fastled.io/>).

786 The 96-LED array was mounted inside the shaking incubator using custom 3D-printed

787 holders. The holders were printed with an Ultimaker S5 using black Ultimaker CPE

788 (Ultimaker, Utrecht, Netherlands) to reduce reflections. For better dissipation and

789 distribution of the heat generated by the LEDs, a custom-made anodized aluminum

790 plate (10 mm thick, with 96 holes of 4 mm diameter) was mounted on top of the 96-

791 LED array. Another 3D-printed adapter was placed between the aluminum plate and

792 the microtiter plate to ensure optical insulation of the wells. The 3D-printed parts and

793 the metal plate were aligned and held in place by metal rods (4 mm diameter, 20 mm  
794 length).

795

796 **Flow Cytometry.** For experiments shown in Figures 1,3,4 and Supplementary Figures  
797 3, 4, 5b, 9b and 9c, fluorescence was measured using the LSR Fortessa flow cytometer  
798 (BD Biosciences). Samples were centrifuged at 4000g for 4 min to remove the glycerol-  
799 containing solution, then the pellets were resuspended in PBS. Data analysis was  
800 performed using the open source FCSalyzer software. The mCherry fluorescence was  
801 excited with a 561 nm laser (50 mW), and emission was detected using a 610/20-nm  
802 filter pass (PMT voltage set to 750 V). The GFP fluorescence was excited with 488 nm  
803 laser (100 mW), and emission was detected using a 530/30-nm filter pass (PMT voltage  
804 set to 405 V). A forward scatter height (FSC-H) threshold of 1,400 was used to gate for  
805 living cells and eliminate debris.  $10^5$  events per sample were recorded for each  
806 experiment. The cell density of the samples was manually regulated by addition of PBS  
807 in order to have less than  $2 \times 10^4$  events/s recorded by the machine. To compensate any  
808 variable that can alter the measurement of the fluorescence by the flow cytometer, each  
809 experiment was normalized with the fluorescence value of the negative control grown  
810 the same day of the experiment. For experiments shown in Figure 6 and Supplementary  
811 Figures 11, 12, 14, 15-17, fluorescence was measured on a Cytoflex S flow cytometer  
812 (Beckman Coulter) equipped with CytExpert 2.1.092 software. The mCherry  
813 fluorescence was excited with a 561 nm laser and emission was detected using a 610/20  
814 nm band pass filter and following gain settings: forward scatter 100, side scatter 100,  
815 mCherry gain 3,000 when mCherry was expressed from the  $I_1$ - $I_2$  promoter, and 300  
816 gain when mCherry was expressed from the  $I_1$ - $I_1$  promoter due to the difference in  
817 expression levels. Thresholds of 2,500 FSC-H and 1,000 SSC-H were used for all

818 samples. The flow cytometer was calibrated before each experiment with QC beads  
819 (CytoFLEX Daily QC Fluorospheres, Beckman Coulter) to ensure comparable  
820 fluorescence values across experiments from different days. At least 15,000 events or  
821 2 min were recorded in a two-dimensional forward and side scatter gate, which was  
822 drawn by eye and corresponded to the experimentally determined size of the testing  
823 strain at logarithmic growth and was kept constant for analysis of all experiments and  
824 used for calculations of the median and CV using the CytExpert software. The same  
825 gating strategy was previously used and is depicted in Supplementary Figure 21.

826

827 **Characterization of the FP1-FP7 VVD-AraC<sub>DBD</sub> fusion constructs.** Chemically  
828 competent *E. coli* MG1655 cells were transformed with pBLADE(FP1\*/FP7\*)-  
829 mCherry, pBLADE(FP1\*\*/FP7\*\*)-mCherry, pBLADE-empty (negative control), and  
830 pBLADE(AraC<sub>WT</sub>\*/AraC<sub>WT</sub>\*\*)-mCherry (positive controls). Overnight cultures of  
831 cells transformed with the FP1-FP7 fusions were diluted to OD<sub>600</sub> 0.1, let grow in the  
832 dark to OD<sub>600</sub> 0.4 and split into two cultures, one of which was kept in the dark and one  
833 of which was illuminated for 4 h. The overnight culture of the negative control was  
834 diluted to OD<sub>600</sub> 0.1, and let grow for the same amount of time as all other cultures  
835 (circa 5 h 30 min). The overnight cultures of the positive controls were diluted to OD<sub>600</sub>  
836 0.1, let grow to OD<sub>600</sub> 0.4 and split into two cultures, one of which was left without  
837 arabinose and one of which was induced with 0.1% arabinose for 4 h. After the  
838 induction time, 200 µl of each sample were collected, mixed with 200 µl of a  
839 transcription and translation inhibition solution (500 µg ml<sup>-1</sup> rifampicin and 50 µg ml<sup>-1</sup>  
840 doxycycline in phosphate buffered saline) and incubated in the dark 90 min at 37°C  
841 with 110 rpm shaking. This protocol allows obtaining a full maturation of almost all  
842 the mCherry proteins translated at the end of the induction time<sup>1</sup>. After the incubation

843 with the inhibitor, samples were either diluted 10 times with PBS and immediately  
844 analyzed with the flow cytometer, or diluted 1:1 with 60% glycerol and frozen at -80°C.

845

846 **Dynamic control of gene expression.** The overnight cultures transformed with  
847 pBLADE(FP6\*\*)-mCherry and pBLADE-empty (negative control) were diluted in TB  
848 to OD<sub>600</sub> 0.05 in dark tubes and let grow until OD<sub>600</sub> 0.15. 200 µl of each sample were  
849 collected, mixed with 200 µl of a transcription and translation inhibition solution (500  
850 µg ml<sup>-1</sup> rifampicin and 50 µg ml<sup>-1</sup> doxycycline in phosphate buffered saline), incubated  
851 in the dark 90 min at 37°C with 110 rpm shaking, diluted 1:1 with 60% glycerol, and  
852 frozen at -80°C. The rest of the culture was transferred in a transparent glass tube and  
853 illuminated with blue light as described (Light illumination systems) for 2 h. Then,  
854 another aliquot was taken and frozen, and the remaining culture was diluted to OD<sub>600</sub>  
855 0.15 again and transferred to a dark tube, for a total of three dark-light cycles.

856

857 **Measurement of the kinetics of BLADE-mediated mCherry expression.**

858 Chemically competent *E. coli* MG1655 cells were transformed with pBLADE(FP6\*)-  
859 mCherry and pBLADE-empty. The overnight cultures were diluted and each split into  
860 two cultures, of which one was induced with blue light and one kept in the dark. Every  
861 hour for 6 h, 200 µl of each sample were collected, mixed with 200 µl of the  
862 transcription and translation inhibition solution, incubated in the dark 90 min at 37°C  
863 with 110 rpm shaking, diluted 1:1 with 60% glycerol, frozen at -80°C and subsequently  
864 analyzed with the flow cytometer.

865

866 **Light intensity titration.** Chemically competent *E. coli* MG1655 cells were  
867 transformed with pBLADE(FP6\*\*)-mCherry and pBLADE-empty. The overnight

868 culture of the cells transformed with pBLADE(FP6\*\*)-mCherry was diluted and split  
869 into 5 independent cultures, each of which was induced with blue light of different  
870 intensity (which was tuned adjusting the voltage in the power supply connected to the  
871 LEDs) for 4 h. The overnight culture of the cells transformed with pBLADE-empty was  
872 diluted and grown in the dark for 4 h. 200 µl of each sample were then collected, mixed  
873 with 200 µl of the transcription and translation inhibition solution, incubated in the dark  
874 90 min at 37°C with 110 rpm shaking, diluted 1:1 with 60% glycerol, frozen at -80°C  
875 and subsequently analyzed with the flow cytometer.

876

877 **Bacterial photography.** Chemically competent *E. coli* MG1655 cells were  
878 transformed with pBLADE(FP6\*)-sfGFP. The overnight culture was diluted in LB to  
879 OD<sub>600</sub> 0.1 and grown for approximately 6 h. A 96-well lid (12.7 x 8.5cm) was filled  
880 with 30-40 ml of 1% LB-agar and let solidify. 1 ml of the culture was then mixed with  
881 9 ml of 0.4% agar at 42°C (measured with infrared thermometer TFA Dostmann  
882 (Wertheim-Reicholzheim, Germany)) and plated on top of the solidified agar in the 96-  
883 well lid. The plate was covered with a transparent plexiglass parallelepiped with the  
884 Blade Runner movie poster sticker. To increase the opacity of the dark zones of the  
885 picture, three identical stickers were overlapped on one another. The plate was then  
886 placed in a 37°C incubator under the light box overnight. The next morning the plate  
887 was imaged with a Zeiss Axio Zoom.V16 stereo zoom microscope equipped with  
888 PlanNeoFluar Z 1.0x objective, zoom 0.7x, AxioCam MR R3 camera and the 38 HE  
889 filter set (Ex BP 470/40, FT 495, Em BP 525/50; sfGFP). The bacteriograph is  
890 composed of 110 tiles stitched together with ZEN Blue software.

891



892 **DIC and fluorescence microscopy.** 5  $\mu$ l of the bacterial culture were applied to a thin  
893 agarose pad composed of 1% agarose for microscopy at room temperature and of 1%  
894 agarose and 0.1% LB in Tethering buffer (10 mM potassium phosphate, 0.1 mM  
895 EDTA, 1 mM L-methionine and 10 mM sodium lactate; pH 7.0) for long-term  
896 microscopy at 37°C. Images were acquired on a Zeiss Axio Observer Z1/7 fluorescence  
897 microscope equipped with an Alpha Plan-Apochromat 100x/1.46 Oil DIC (UV) M27  
898 objective, filter sets 38 HE (Ex BP 470/40, FT 495, Em BP 525/50; sfGFP), 108 HE  
899 (Ex BP 423/44, DBS 450+538, Em DBP 467/24+598/110; MM 4-64), 96 HE (Ex BP  
900 390/40, FT 420, Em BP 450/40; DAPI), 64 HE (Ex BP 587/25, FT 605, Em BP 647/70;  
901 mCherry) and an Axiocam 506 Mono camera. To image the library of genes with  
902 unknown or poorly defined function in a fast and efficient way, the samples (circa 5  
903 ml) were applied to a 96-well lid, which was filled with 1% agarose, let solidify and  
904 covered with two 75 x 50 mm glass coverslips (Carl Roth GmbH, Karlsruhe). Before  
905 imaging, samples were incubated for 5 min with 1.2  $\mu$ g ml<sup>-1</sup> of the membrane dye MM  
906 4-64 (AAT Bioquest Sunnyvale, CA) and 0.5  $\mu$ g ml<sup>-1</sup> of 4',6-diamidino-2-phenylindole  
907 (DAPI, Sigma-Aldrich Chemie GmbH).

908 The induction of gene expression in selected cells within a population of MG1655 cells  
909 transformed with pBLADE(FP6\*\*)-sfGFP was performed on a Zeiss LSM 800  
910 confocal microscope. An area of 6.4  $\mu$ m<sup>2</sup> was illuminated with a 488 nm diode laser  
911 (10 mW) at 0.1% intensity, with a frame average of 8, resulting in 0.36  $\mu$ s of light per  
912 pixel. The illumination was given in pulses of 5 min for a duration of 3 h.

913

914 **FRAP.** FRAP was performed on a Zeiss LSM 800 confocal microscope. An overnight  
915 culture of MG1655 cells transformed with pBLADE((FP6-sfGFP)\*)-mCherry was  
916 diluted in the morning in fresh TB medium to OD<sub>600</sub> 0.1, and grown until it reached

917 OD<sub>600</sub> 0.4. 5 µl of the culture were then applied to a thin 1% agarose pad. After selecting  
918 a cell with a bright fluorescent spot, the area to bleach within the cell (whole spot) was  
919 manually set (the whole focus) and bleached with a single 1 s pulse of a 488 nm diode  
920 laser (10 mw) at 50% intensity. An image in the GFP channel (filter set 38 HE: Ex BP  
921 470/40, FT 495, Em BP 525/50) was taken 5- and 15-min post bleaching to measure  
922 the recovery of the fluorescent signal.

923

924 **Induction of *rodZ* in KC717 cells.** Strain KC717 (kind gift of KC Huang, Stanford  
925 University) was grown in LB medium supplemented with 0.2% arabinose (to maintain  
926 the cells rod-shaped) during transformation of chemically competent KC717 cells and  
927 DNA extraction procedures. The blue light and arabinose induction were performed as  
928 described above. The recovery phase of the culture induced with arabinose was  
929 performed by centrifuging it at 6000g for 4 min and resuspending it with the same  
930 volume of LB. The centrifugation and resuspension steps were repeated a second time  
931 and the culture was then diluted to OD<sub>600</sub> 0.1. The recovery phase of the culture  
932 transformed with pBLADE(FP4\*\*) was performed by dilution of the culture exposed  
933 to blue light OD<sub>600</sub> 0.1 and incubation in the dark.

934

935 **BLADE (FP6) expression and purification.** Chemically competent *E. coli* Rosetta  
936 (DE3) cells carrying the pLysS plasmid were freshly transformed with pET28a-FP6  
937 and cultivated overnight in LB medium supplemented with 50 µg ml<sup>-1</sup> kanamycin. LB  
938 medium (1 l) containing kanamycin was inoculated using the pre-culture to obtain  
939 OD<sub>600</sub> of 0.1. The culture was grown at 37°C until OD<sub>600</sub> of 0.5, after which 1 mM  
940 IPTG and 5 µM FAD were added, and the culture was grown for 16 h at 18°C under  
941 constant blue light. Cells were collected by centrifugation and the pellet was re-

942 suspended in 30 ml of lysis buffer (50 mM potassium phosphate pH 8.0, 300 mM NaCl  
943 and 10 mM imidazole pH 8.0) supplemented with a cOmplete™ protease inhibitor  
944 cocktail tablet (Roche). Cell lysis was performed by sonication and the lysate was  
945 centrifuged at 20,000 rpm for 20 min at 4°C. The supernatant was then co-incubated  
946 with 1 ml of HisPur™ Ni-NTA Resin (Thermo Scientific) for 2 h at 4°C. Protein  
947 purification was performed by the gravity flow method. The bound proteins were  
948 washed twice with 5 ml of wash buffer (lysis buffer + 10 % glycerol + 20 mM  
949 imidazole) and finally eluted with 1.5 ml of elution buffer (50 mM potassium phosphate  
950 pH 7.5, 300 mM NaCl, 500 mM imidazole pH 8.0 and 10 % glycerol). The elution  
951 buffer was replaced with a storage buffer (20 mM HEPES-NaOH pH 7.5, 150 mM  
952 NaCl and 10 % glycerol) using an Amicon® Ultra-4 regenerated cellulose NMWL 10  
953 kDa centrifugal filter unit (Merck). The protein was then stored as 50 µl aliquots at -  
954 80°C. We verified that the purified protein could respond to light by measuring the  
955 absorption spectrum (Supplementary Fig. 20).

956

957 **Spectroscopy.** The absorption spectrum of the FAD cofactor bound to VVD within  
958 BLADE (FP6) was measured exciting the sample in the 300-600 nm range using a  
959 Multiskan GO (Thermo Scientific) plate reader. The protein sample was incubated 4  
960 days at 4°C in the dark in a buffer solution (25 mM HEPES, 150 mM NaCl, 10%  
961 glycerol, 0.1% EDTA; pH 7.5) and then diluted to 0.5 mg ml<sup>-1</sup> prior to the measurement  
962 of the absorption spectrum in the dark state. The same sample was then illuminated  
963 with blue light (455 nm; 50 W/m<sup>2</sup>) for 5 min at room temperature and the absorption  
964 spectrum in the lit state was measured. The absorption spectrum of the blank (only  
965 medium) was subtracted from the dark and lit state spectra.

966

967 **SEC.** Purified BLADE (FP6) was thawed and stored in complete darkness at 4°C for 6  
968 days. The sample (1 ml of protein with a concentration of 0.5 mg ml<sup>-1</sup>) was loaded onto  
969 a Superdex™ 75 Increase 10/300 GL (GE Healthcare Lifesciences) column at 4°C. The  
970 running buffer consisted of 20 mM HEPES-NaOH pH 7.5, 150 mM NaCl and 10 %  
971 glycerol, and the flowrate was adjusted to 0.25 ml min<sup>-1</sup>. Dimerization of BLADE FP6  
972 was triggered by incubating the protein under constant blue light (455 nm; 50 W/m<sup>2</sup>)  
973 for 30 min at 4°C, prior to injection. During the run, the column was either illuminated  
974 with constant blue light (460 nm; 8 W/m<sup>2</sup>, lit sample) or kept in complete darkness  
975 (dark sample). Bovine serum albumin (BSA) and carbonic anhydrase (CA) were used  
976 as size markers at a concentration of 0.5 mg ml<sup>-1</sup> each.

977

978 **Light-induced expression of genes with unknown or poorly defined function.**

979 Chemically competent MG1655 cells were transformed with the 117 pBLADE  
980 plasmids constituting the library to characterize the 39 genes with unknown or poorly  
981 defined function. Cultures were grown in the dark overnight in LB in non-treated 96-  
982 well plate (VWR, Radnor, PA) at 37°C with 110 rpm shaking. The following morning  
983 a Scienceware® replicator (96-well; Merck KGaA, Darmstadt, Germany) was used to  
984 transfer about 5 µl of each culture into a fresh 96-well plate with 145 µl of TB in each  
985 well. The diluted cultures were incubated at 18°C with 110 rpm shaking for 1 h in the  
986 dark and then they were induced with blue light (455 nm, 5 W/m<sup>2</sup>) for 4 h.

987

988 **Measurement of bacterial growth.** The growth curves of the cells transformed with  
989 the library of genes with unknown or poorly defined function were measured on a  
990 Synergy H4 Hybrid plate reader (BioTek) in 96-well plates. The cultures were grown  
991 in the dark overnight in LB in a 96-well plate at 37°C with 110 rpm shaking. The

992 following morning the cultures were diluted to OD<sub>600</sub> 0.1 in a fresh 96-well plate with  
993 120 µl of LB. To prevent evaporation of the medium, also the unused wells of the plate  
994 were filled with the same amount of LB and the lid was sealed with parafilm. The plate  
995 was then illuminated with blue light (460 nm) and the OD<sub>600</sub> of the culture was  
996 measured every 2 min in constant shaking for 20 h.

997 The overnight cultures of three selected members of the library (*ydaT*, *ydhL*, *yhcF*)  
998 were diluted in LB to OD<sub>600</sub> 0.1 and grown until they reached OD<sub>600</sub> 0.4. Each culture  
999 was then split into two tubes, one of which was kept in the dark and one of which was  
1000 illuminated for 4 h at 37°C with shaking at 250 rpm. The OD<sub>600</sub> was measured at the  
1001 end of the growth with the OD600 DiluPhotometer™ (Implen).

1002

1003 **Quantification of cell length, width and roundness.** The cell length and width were  
1004 calculated by first staining the cell with the membrane dye MM 4-64 (AAT Bioquest  
1005 Sunnyvale, CA) to visualize the cell contour, and then manually measuring the long  
1006 and short axes of the cell, respectively, using the straight-line ‘Selection’ tool of Fiji.  
1007 At least 500 cells were measured for each sample. The histograms were generated in  
1008 Excel by the Analysis ToolPak’s Histogram option. The roundness was manually  
1009 calculated with the oval ‘Selection’ tool on unstained cells, using Fiji. At least 200 cells  
1010 were measured for each sample.

1011

1012 **Computational prediction of function and localization of 39 genes with unknown**  
1013 **or poorly defined function.** We randomly selected 34 genes out of the *y-ome*, defined  
1014 as the group of genes lacking to date experimental evidence of function<sup>36</sup>. We manually  
1015 checked that the selected genes were not mentioned in any publication using several  
1016 search engines. As controls for our pipeline, we included 5 genes for which some

1017 information was available (*ydaT*<sup>37</sup>; *ydiY*<sup>38</sup>; *ycbK* (MepK)<sup>39</sup>; *yehS*<sup>40</sup>; and *yebE*<sup>41, 42</sup>). We  
1018 retrieved the amino acid sequences of the proteins encoded by all 39 genes in FASTA  
1019 format and submitted them to the following webserver: Argot2.5<sup>46</sup>, PANNZER2<sup>47</sup>,  
1020 DeepGoPlus<sup>48</sup> and Phyre2<sup>49</sup>. The consensus localization and function were calculated  
1021 as the output provided by at least 2/4 prediction tools.

1022

1023 **Mathematical modelling.** The LacI IPTG dose-response was fitted to a Hill equation  
1024 of the following form:

1025 
$$f(x) = r_{\max} \frac{x^n}{k_m + x^n}$$

1026 where  $f(x)$  describes the gene expression controlled by LacI,  $x$  represents the IPTG  
1027 concentration,  $r_{\max}$  is the maximal promoter expression,  $k_m$  is IPTG's dissociation  
1028 constant for LacI, and  $n$  is the Hill coefficient for LacI. This dose-response was used  
1029 subsequently to obtain IPTG concentration estimates from the fluorescence readouts of  
1030 the constitutive promoters. All data were fitted using a non-linear least squares  
1031 optimizer (MATLAB, MathWorks) with fitted parameter values  $r_{\max} = 21352$ ,  $k_m = 62$ ,  
1032  $n = 1.7$ .

1033

#### 1034 **Acknowledgements**

1035 We thank Maximilian Hörner for his help with the determination of the absorption  
1036 spectrum of BLADE, João Nuno de Sousa Machado for his help with size-exclusion  
1037 chromatography, Yanik Weber for help with characterizing the 96-well light induction  
1038 plate, KC Huang for sharing with us KC717 strain, and Stephanie Aoki for helpful  
1039 discussions. This study was funded by the DFG (grant no. VE776/2-1 to B.D.V.), by  
1040 the BMBF (grant no. 031L0079 to B.D.V.), by the Excellence Initiative of the German  
1041 Federal and State Governments BIOSS (Centre for Biological Signalling Studies; EXC-

1042 294), by the European Research Council (ERC-Advanced) under the European Union's  
1043 Horizon 2020 research and innovation programme (grant agreement number 743269).

1044

#### 1045 **Author contributions**

1046 B.D.V. and A.B. conceived the study. B.D.V and M.K. supervised the study, and  
1047 secured funding. E.R., A.B., E.A., N.P., M.K. and B.D.V. designed experiments and  
1048 interpreted the data. E.R., A.B., M.H. and E.A. performed *in vivo* experiments. N.P.  
1049 purified BLADE, and performed size-exclusion chromatography. L.E. performed  
1050 initial experiments, which validated the idea. G.S. developed the 96-well light setup in  
1051 collaboration with A.B. M.A.Ö. performed bioinformatics and computational structural  
1052 biology analyses of the genes with unknown function. E.R., A.B., M.K. and B.D.V.  
1053 wrote the manuscript.

1054

#### 1055 **Competing interests**

1056 The authors declare no competing interests.

1057

#### 1058 **Data availability**

1059 The plasmids constructed in this study will be deposited on Addgene and will be  
1060 additionally available from the corresponding authors upon request. The raw data  
1061 supporting the conclusions of the paper will also be available from the corresponding  
1062 authors upon request.

1063

1064

1065

1066

## 1067 Figures

1068

1069

1070

1071

1072

1073

1074

1075

1076

1077

1078

1079

1080

1081

1082

1083

1084

1085

1086

1087

1088

1089

1090

1091

1092

1093

  

1094

1095

1096

1097

1098

1099

1100

1101

1102

1103

1104

1105

1106

1107

1108

1109

1110

1111

1112

1113

1114

1115

1116

1117

1118

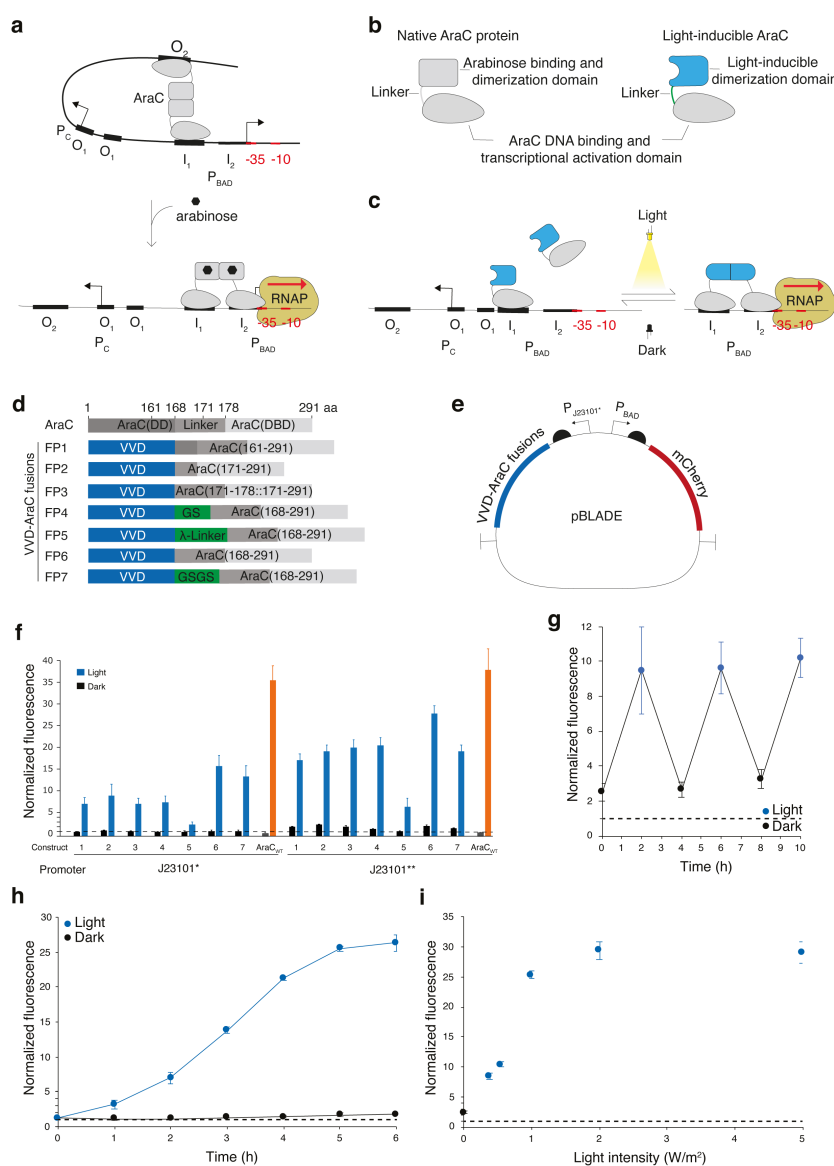



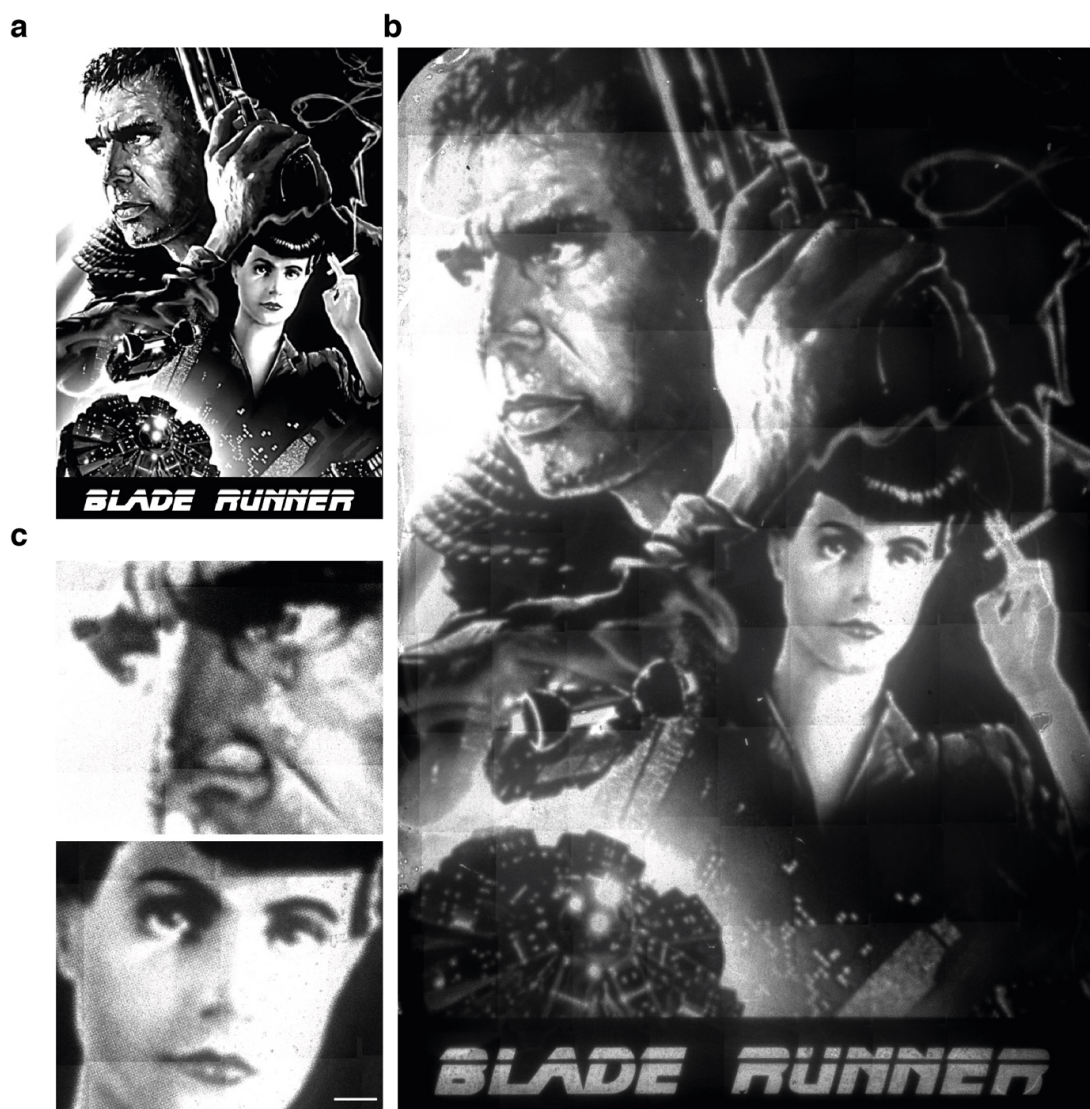

1119  
1120  
1121  
1122  
1123  
1124  
1125  
1126  
1127  
1128  
1129  
1130  
1131  
1132  
1133  
1134  
1135

**Fig. 2| BLADE allows for the production of high contrast bacteriographs.** **a**, Photomask used to produce the bacteriograph (printed with permission from Warner Bros. Entertainment, Inc.). **b**, Bacteriograph. A lawn of *E. coli* MG1655 cells transformed with pBLADE(FP6\*)-sfGFP were grown overnight at 37°C while being exposed to blue light through the photomask in (**a**). 110 individual images were taken with a fluorescent microscope and stitched together via image analysis software. Scale bar, 1 cm. **c**, Zoom in on two parts of the bacteriographs. Scale bar, 300  $\mu$ m.

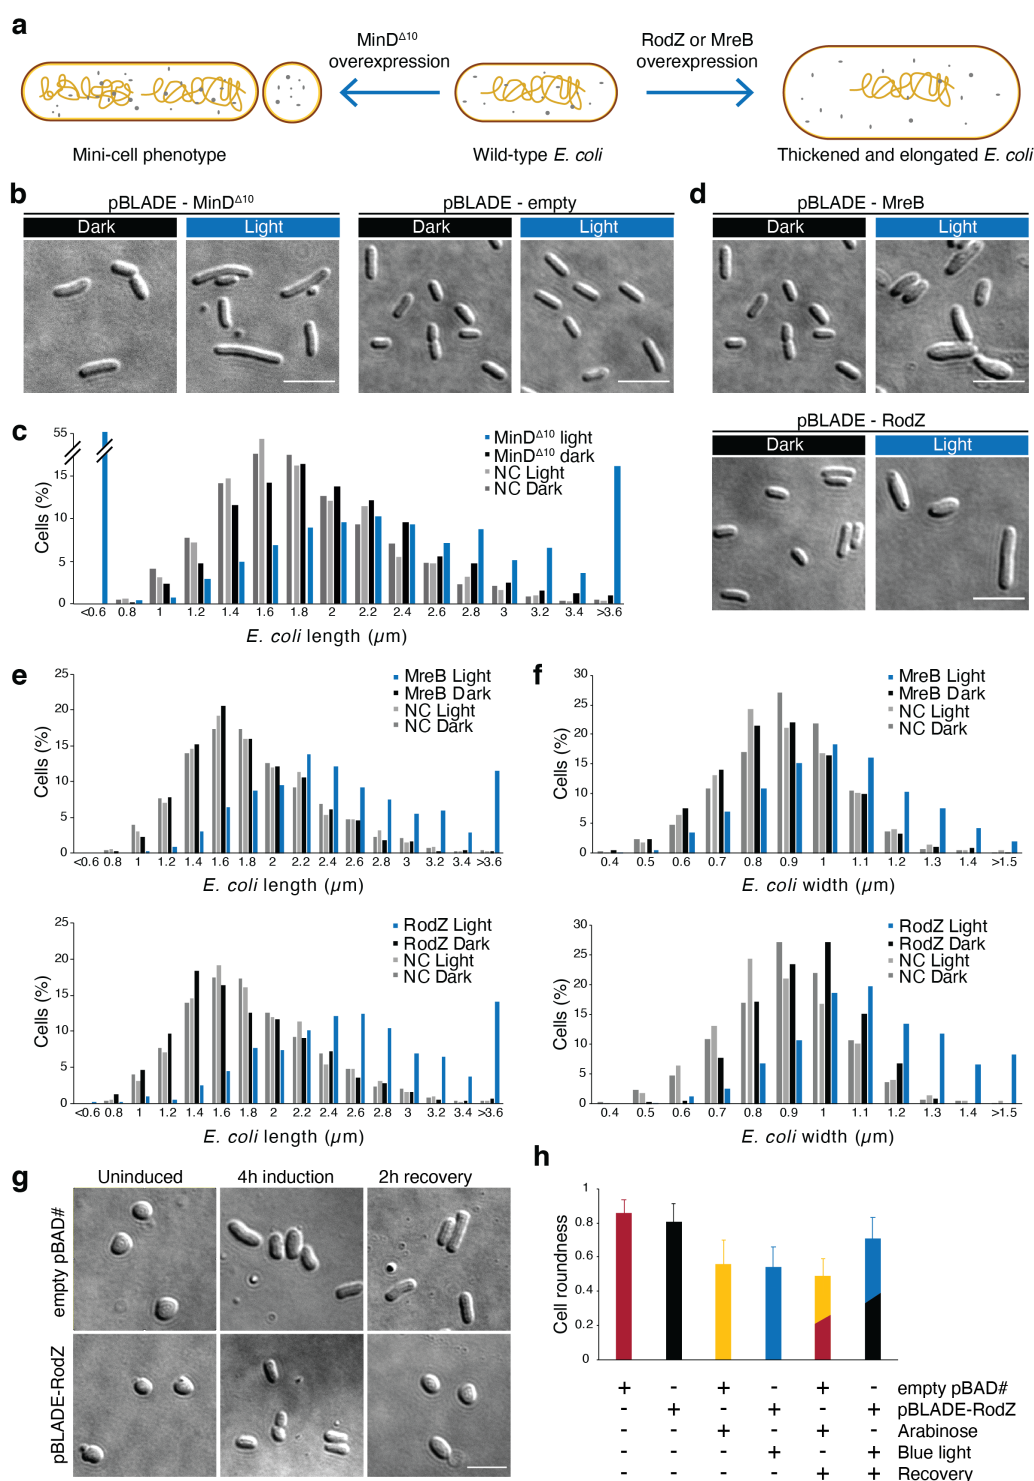

1136 **Fig. 3| BLADE enables reversible control of cell morphology.** **a**, Phenotypes expected when  
 1137 overexpressing the indicated proteins. **b,d**, Representative DIC images of *E. coli* MG1655 cells  
 1138 transformed with the indicated constructs grown for 4 h either in the dark or under 460 nm (5 W/m<sup>2</sup>)  
 1139 illumination. **c,e,f**, Quantification of cell length distribution for the indicated samples and conditions.  
 1140 NC, pBLADE-empty. **g**, Representative DIC images of *E. coli* KC717 cells transformed with the  
 1141 indicated constructs at the indicated time points. Induction indicates 460 nm light (5 W/m<sup>2</sup>) for the cells  
 1142 transformed with pBLADE-RodZ and 0.2% arabinose for the cells transformed with an empty pBAD33  
 1143 from which the P<sub>BAD</sub> promoter was removed (pBAD#). Recovery indicates darkness for the cells  
 1144 transformed with pBLADE-RodZ and growth in a medium without arabinose for the cells transformed  
 1145 with pBAD#. **h**, Quantification of the cell roundness for the samples and conditions in (**g**). **b,d,g**, Scale  
 1146 bar, 5  $\mu\text{m}$ . **c,e,f,g**, Values represent mean  $\pm$  s.d. of  $n=3$  independent experiments. **b-h**, BLADE variant:  
 1147 FP4 driven by the J23101\*\* promoter.

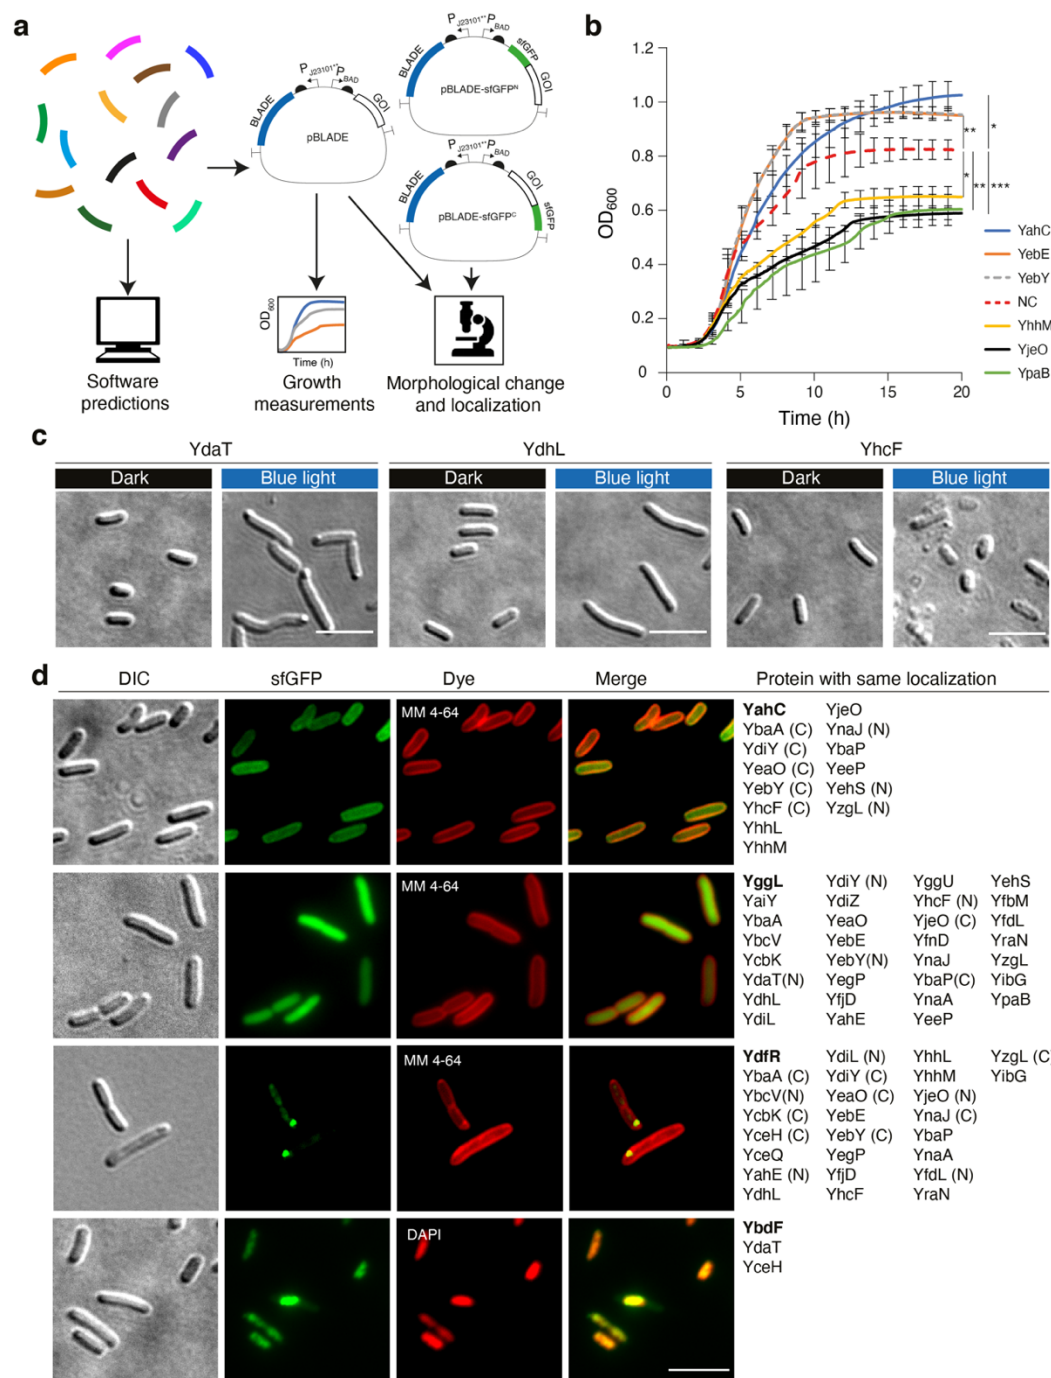

1148 **Fig. 4| BLADE facilitates the characterization of *E. coli* genes with unknown or poorly defined**  
 1149 **function.** **a**, Overview of the workflow. pBLADE-sfGFP<sup>N</sup>, plasmid for sfGFP N-terminal fusion;  
 1150 pBLADE-sfGFP<sup>C</sup>, plasmid for sfGFP C-terminal fusion. **b**, Growth curves of *E. coli* MG1655 cells  
 1151 transformed with pBLADE carrying the indicated proteins. NC, cells transformed with the empty  
 1152 plasmid. Values represent mean  $\pm$  s.d. of  $n=3$  independent experiments. Single asterisk (\*),  $p$ -value<0.5  
 1153 (two-tailed, homoscedastic Student's  $t$  test); double asterisk (\*\*),  $p$ -value<0.01 (two-tailed,  
 1154 homoscedastic Student's  $t$  test); triple asterisk (\*\*\*),  $p$ -value<0.001 (two-tailed, homoscedastic  
 1155 Student's  $t$  test). **c**, Representative DIC images of *E. coli* MG1655 cells transformed with pBLADE  
 1156 carrying the indicated proteins grown for 4h either in the dark or under 460 nm light (5 W/m<sup>2</sup>)  
 1157 illumination. **d**, Representative images of *E. coli* MG1655 cells transformed with pBLADE-sfGFP<sup>N</sup>  
 1158 carrying the proteins indicated in bold in the right-most column grown for 4h under 460 nm light (5  
 1159 W/m<sup>2</sup>) illumination. (N), localization obtained only with N-terminal fusion; (C), localization obtained  
 1160 only with C-terminal fusion. The membrane was stained with the MM 4-64 dye and the nucleoid with  
 1161 DAPI. **c,d**, Scale bar, 5  $\mu$ m.



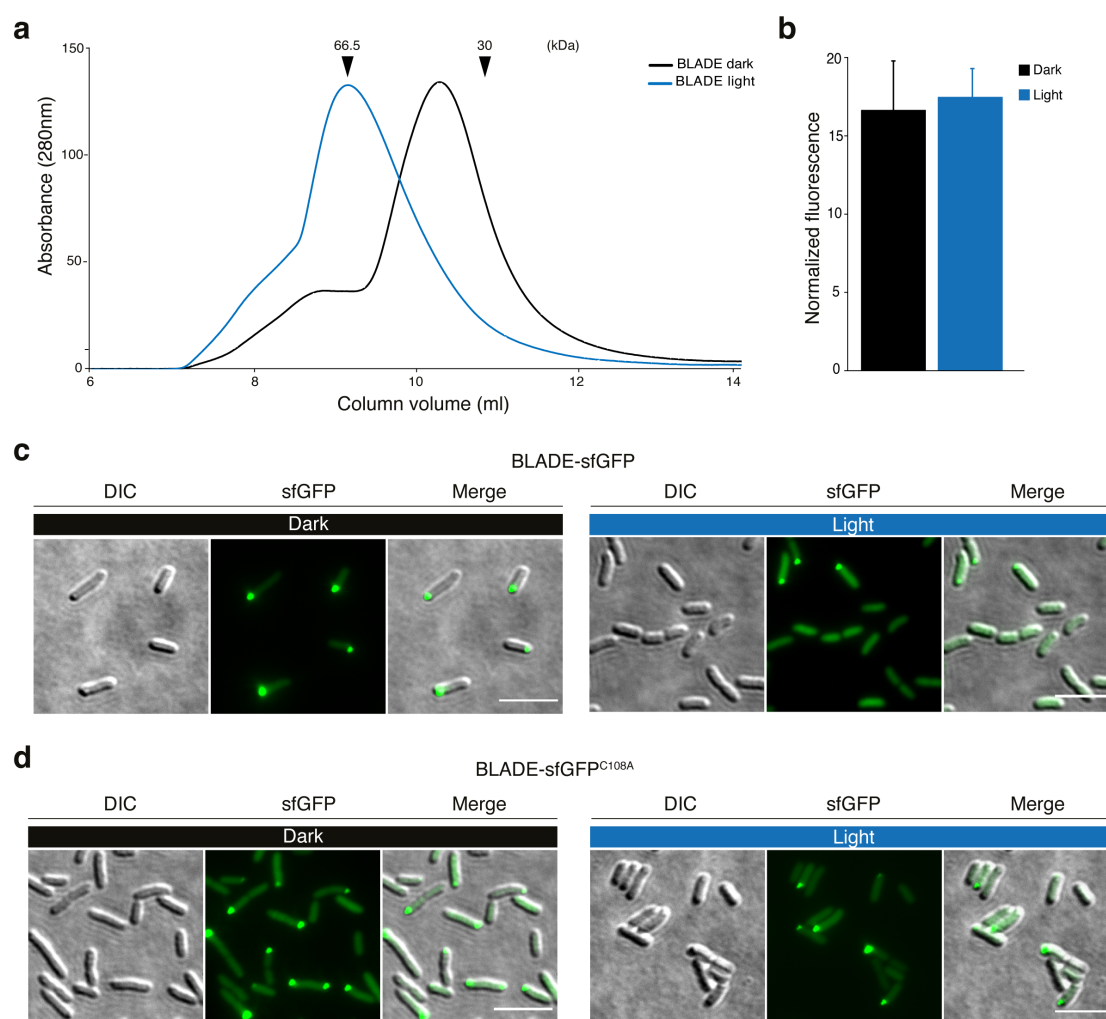

1162  
1163 **Fig. 5| BLADE-mediated light-induced gene expression involves the formation of aggregates in the**  
1164 **dark and of dimers in the light.** **a**, SEC performed with purified BLADE in the dark or illuminated  
1165 with 460 nm light (5 W/m<sup>2</sup>) for 30 minutes at 4°C. **b**, GFP fluorescence intensity measured in *E. coli*  
1166 MG1655 cells transformed with a modified pBLADE in which BLADE was C-terminally fused with  
1167 sfGFP grown for 4h in the dark or under 460 nm light (5 W/m<sup>2</sup>) light. **c,d**, Representative microscopy  
1168 images of *E. coli* MG1655 cells expressing the indicated BLADE variant C-terminally fused to sfGFP  
1169 grown for 4h in the dark or under 460 nm light (5 W/m<sup>2</sup>) light. Scale bar, 5 µm.

1170  
1171  
1172  
1173  
1174  
1175  
1176  
1177  
1178  
1179  
1180  
1181  
1182

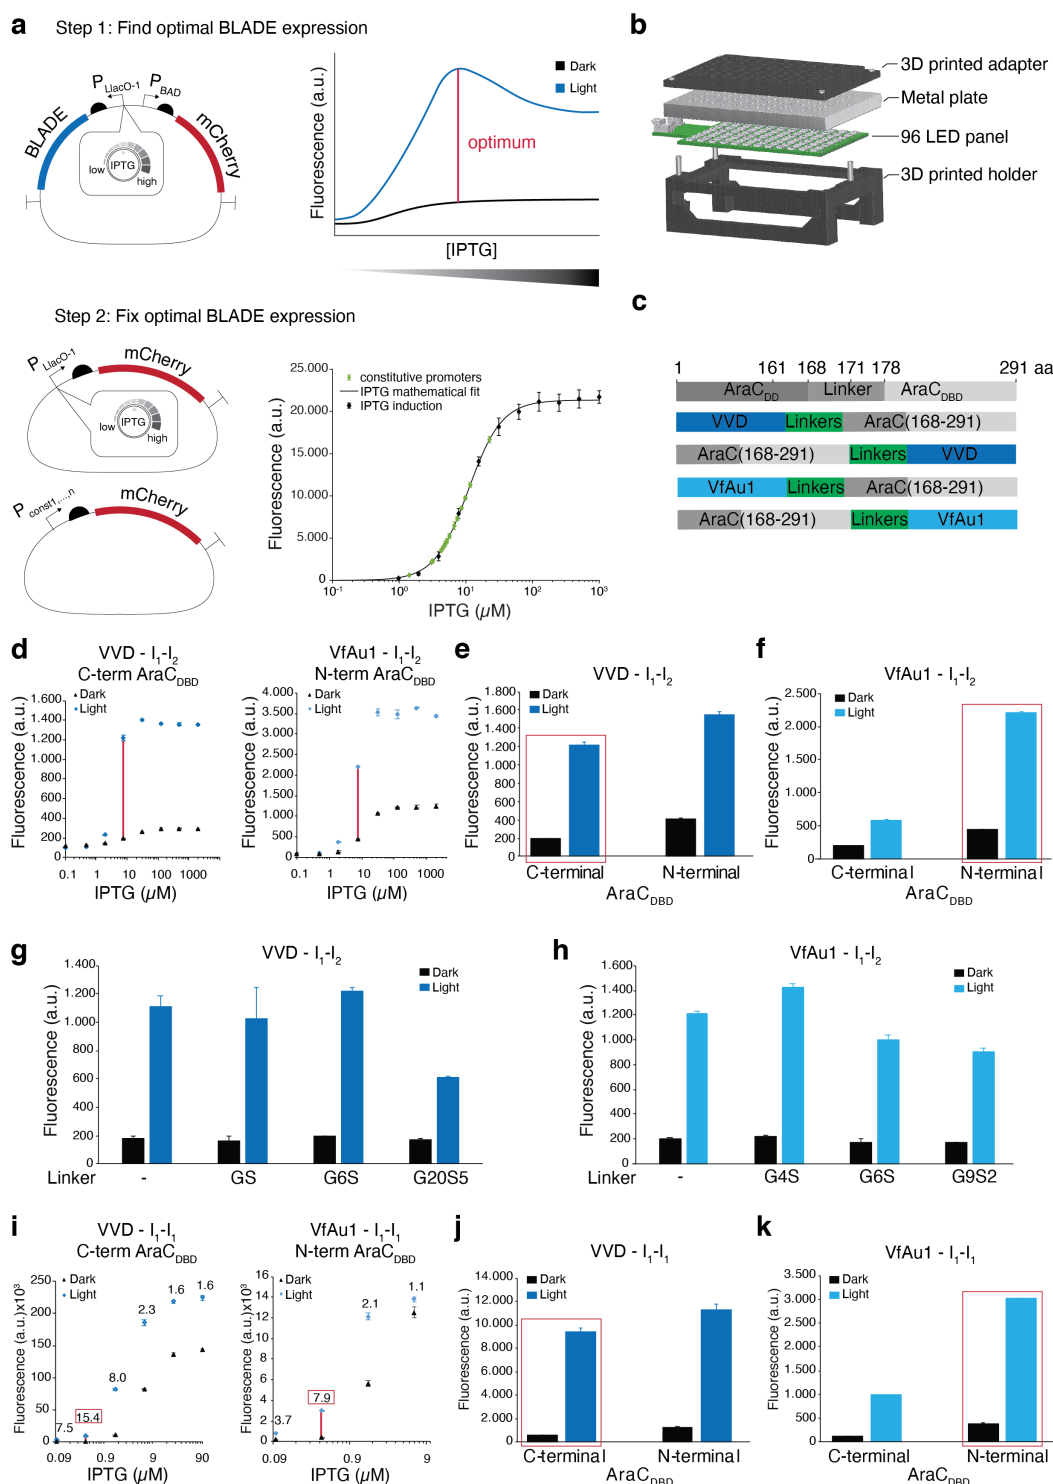

1183  
1184  
1185  
1186  
1187  
1188  
1189  
1190  
1191  
1192  
1193  
1194

**Fig. 6 | Engineering an optimized and expanded family of BLADE TFs. a**, A two-step protocol was used to optimize the expression levels of the TFs. Upper panel: left, the plasmid used in step 1 contains IPTG-inducible chimeric BLADE transcription factors (cTFs) and an mCherry reporter under the P<sub>BAD</sub> promoter. Upstream regulatory sequences (O<sub>1</sub> and O<sub>2</sub> half-sites) have been deleted. Each IPTG concentration induces a different BLADE cTF level with a corresponding light/dark mCherry expression profile. Measuring these profiles at varying IPTG concentrations allows for the identification of a profile that is optimal with respect to a desired property. Right, example of a scenario for which the highest mCherry levels are obtained at intermediate cTF levels (red line). Bottom panel: In step 2, the range of transcriptional rates induced by different IPTG concentrations is mapped to the rates of constitutive promoters in a library (right), allowing for the identification of a constitutive promoter that matches the desired optimal BLADE expression level. **b**, Light induction setup for 96-well microtiter plates

1195 containing a panel of 96 light emitting diodes (LEDs), 3D-printed holders and a metal plate for heat  
1196 dissipation. **c**, Domain composition of the engineered light-inducible dimerization domain (VVD and  
1197 VfAu1)-AraC<sub>DBD</sub> fusion constructs. **d**, Examples of IPTG dose-response curves obtained with BW25113  
1198  $\Delta araC + lacYAI77C$  cells transformed with the indicated constructs (VVD::G<sub>6</sub>S::AraC<sub>DBD</sub> and  
1199 AraC<sub>DBD</sub>::(G<sub>4</sub>S)<sub>5</sub>::VfAu1). The highest light/dark fold change is indicated with a red line between the  
1200 corresponding data points. **e**, mCherry fluorescence intensity in BW25113  $\square araC + lacYAI77C$  cells  
1201 transformed with the VVD::G<sub>6</sub>S::AraC<sub>DBD</sub> fusion (N-terminal) and the AraC<sub>DBD</sub>::G<sub>4</sub>S::VVD fusion (C-  
1202 terminal) in the presence of 7.81  $\mu$ M IPTG. The samples in the red box are taken from the dose response  
1203 curve shown in **(d)**. The IPTG dose-response curve of AraC<sub>DBD</sub>::G<sub>4</sub>S::VVD is shown in Supplementary  
1204 Fig. 14. **f**, mCherry fluorescence intensity in BW25113  $\square araC + lacYAI77C$  cells transformed with the  
1205 VfAu1::(G<sub>4</sub>S)<sub>5</sub>::AraC<sub>DBD</sub> fusion (N-terminal) and the AraC<sub>DBD</sub>::(G<sub>4</sub>S)<sub>5</sub>::VfAu1 fusion (C-terminal)  
1206 grown in the presence of 7.81  $\mu$ M IPTG. The samples in the red box are taken from the dose response  
1207 curve shown in **(d)**. The IPTG dose-response curve of VfAu1::(G<sub>4</sub>S)<sub>5</sub>::AraC<sub>DBD</sub> is shown in  
1208 Supplementary Fig. 15. **g**, mCherry fluorescence intensity in BW25113  $\square araC + lacYAI77C$  cells  
1209 transformed with a small library of C-terminal AraC<sub>DBD</sub> fusions with VVD with the indicated linkers  
1210 between the two domains. The corresponding IPTG dose-response curves are shown in Supplementary  
1211 Fig. 14. **h**, mCherry fluorescence intensity in BW25113  $\Delta araC + lacYAI77C$  cells transformed with a  
1212 small library of C-terminal AraC<sub>DBD</sub> fusions with VfAu1 with the indicated linkers between the two  
1213 domains. The corresponding IPTG dose-response curves are shown in Supplementary Fig. 15. **i**, Same  
1214 as in **(d)** but with a synthetic P<sub>BAD</sub> promoter containing two copies of the I<sub>1</sub> half-site. The highest  
1215 light/dark fold change is indicated with a red line between the corresponding data points. **j**, Same as in  
1216 **(e)** but with a synthetic P<sub>BAD</sub> promoter containing two copies of the I<sub>1</sub> half-site and 0.391  $\mu$ M IPTG. The  
1217 IPTG dose-response curve of AraC<sub>DBD</sub>::G<sub>4</sub>S::VVD is shown in Supplementary Fig. 16. **k**, Same as in **(f)**  
1218 but with a synthetic P<sub>BAD</sub> promoter containing two copies of the I<sub>1</sub> half-site and 0.391  $\mu$ M IPTG. The  
1219 samples in the red box are taken from the dose response curve shown in **(i)**. The IPTG dose-response  
1220 curve of VfAu1::(G<sub>4</sub>S)<sub>5</sub>::AraC<sub>DBD</sub> is shown in Supplementary Fig. 17. All values represent mean  $\pm$  s.d.  
1221 of  $n=2$  or 3 independent experiments. In all experiments, cells were grown for 5h either in the dark or  
1222 under 460 nm light illumination.  
1223  
1224  
1225  
1226  
1227  
1228  
1229  
1230

1231

1232

1233

1234

1235

1236

1237

1238

1239

## 1240 References

- 1241 1. Bren, A. *et al.* Glucose becomes one of the worst carbon sources for E.coli on  
1242 poor nitrogen sources due to suboptimal levels of cAMP. *Sci Rep* **6**, 24834  
1243 (2016).
- 1244 2. Monod, J. Recherches sur la croissance des cultures bactériennes. *Band 911*  
1245 *von Actualités scientifiques et industrielles*, (1942).
- 1246 3. Schleif, R. Regulation of the L-arabinose operon of Escherichia coli. *Trends*  
1247 *Genet* **16**, 559-565 (2000).
- 1248 4. Schleif, R. AraC protein, regulation of the l-arabinose operon in Escherichia  
1249 coli, and the light switch mechanism of AraC action. *FEMS Microbiol Rev* **34**,  
1250 779-796 (2010).
- 1251 5. Wang, X., Chen, X. & Yang, Y. Spatiotemporal control of gene expression by  
1252 a light-switchable transgene system. *Nat Methods* **9**, 266-269 (2012).
- 1253 6. Chen, X. *et al.* An extraordinary stringent and sensitive light-switchable gene  
1254 expression system for bacterial cells. *Cell Res* **26**, 854-857 (2016).
- 1255 7. Colavin, A., Shi, H. & Huang, K.C. RodZ modulates geometric localization of  
1256 the bacterial actin MreB to regulate cell shape. *Nat Commun* **9**, 1280 (2018).
- 1257 8. Rengby, O. & Arner, E.S. Titration and conditional knockdown of the prfB  
1258 gene in Escherichia coli: effects on growth and overproduction of the  
1259 recombinant mammalian selenoprotein thioredoxin reductase. *Appl Environ*  
1260 *Microbiol* **73**, 432-441 (2007).
- 1261 9. Roux, A., Beloin, C. & Ghigo, J.M. Combined inactivation and expression  
1262 strategy to study gene function under physiological conditions: application to  
1263 identification of new Escherichia coli adhesins. *J Bacteriol* **187**, 1001-1013  
1264 (2005).
- 1265 10. Schwerdtfeger, C. & Linden, H. VIVID is a flavoprotein and serves as a  
1266 fungal blue light photoreceptor for photoadaptation. *EMBO J* **22**, 4846-4855  
1267 (2003).
- 1268 11. Bustos, S.A. & Schleif, R.F. Functional domains of the AraC protein. *Proc*  
1269 *Natl Acad Sci U S A* **90**, 5638-5642 (1993).
- 1270 12. Timmes, A., Rodgers, M. & Schleif, R. Biochemical and physiological  
1271 properties of the DNA binding domain of AraC protein. *J Mol Biol* **340**, 731-  
1272 738 (2004).
- 1273 13. Sheets, M.B., Wong, W.W. & Dunlop, M.J. Light-Inducible Recombinases for  
1274 Bacterial Optogenetics. *ACS Synth Biol* **9**, 227-235 (2020).
- 1275 14. Xu, X. *et al.* A Single-Component Optogenetic System Allows Stringent  
1276 Switch of Gene Expression in Yeast Cells. *ACS Synth Biol* **7**, 2045-2053  
1277 (2018).
- 1278 15. Vaidya, A.T., Chen, C.H., Dunlap, J.C., Loros, J.J. & Crane, B.R. Structure of  
1279 a light-activated LOV protein dimer that regulates transcription. *Sci Signal* **4**,  
1280 ra50 (2011).
- 1281 16. Zoltowski, B.D. & Crane, B.R. Light activation of the LOV protein vivid  
1282 generates a rapidly exchanging dimer. *Biochemistry* **47**, 7012-7019 (2008).
- 1283 17. de Boer, P.A., Crossley, R.E. & Rothfield, L.I. A division inhibitor and a  
1284 topological specificity factor coded for by the minicell locus determine proper  
1285 placement of the division septum in E. coli. *Cell* **56**, 641-649 (1989).
- 1286 18. Di Ventura, B. *et al.* Chromosome segregation by the Escherichia coli Min  
1287 system. *Mol Syst Biol* **9**, 686 (2013).

- 1288 19. de Boer, P.A., Crossley, R.E. & Rothfield, L.I. Roles of MinC and MinD in  
1289 the site-specific septation block mediated by the MinCDE system of  
1290 Escherichia coli. *J Bacteriol* **174**, 63-70 (1992).
- 1291 20. Hu, Z., Mukherjee, A., Pichoff, S. & Lutkenhaus, J. The MinC component of  
1292 the division site selection system in Escherichia coli interacts with FtsZ to  
1293 prevent polymerization. *Proc Natl Acad Sci U S A* **96**, 14819-14824 (1999).
- 1294 21. Raskin, D.M. & de Boer, P.A. Rapid pole-to-pole oscillation of a protein  
1295 required for directing division to the middle of Escherichia coli. *Proc Natl*  
1296 *Acad Sci U S A* **96**, 4971-4976 (1999).
- 1297 22. Pedelacq, J.D., Cabantous, S., Tran, T., Terwilliger, T.C. & Waldo, G.S.  
1298 Engineering and characterization of a superfolder green fluorescent protein.  
1299 *Nat Biotechnol* **24**, 79-88 (2006).
- 1300 23. Levskaya, A. *et al.* Synthetic biology: engineering Escherichia coli to see  
1301 light. *Nature* **438**, 441-442 (2005).
- 1302 24. Yang, D.C., Blair, K.M. & Salama, N.R. Staying in Shape: the Impact of Cell  
1303 Shape on Bacterial Survival in Diverse Environments. *Microbiol Mol Biol Rev*  
1304 **80**, 187-203 (2016).
- 1305 25. Smith, W.P. *et al.* Cell morphology drives spatial patterning in microbial  
1306 communities. *Proc Natl Acad Sci U S A* **114**, E280-E286 (2017).
- 1307 26. Hu, Z. & Lutkenhaus, J. A conserved sequence at the C-terminus of MinD is  
1308 required for binding to the membrane and targeting MinC to the septum. *Mol*  
1309 *Microbiol* **47**, 345-355 (2003).
- 1310 27. Szeto, T.H., Rowland, S.L., Habrukowich, C.L. & King, G.F. The MinD  
1311 membrane targeting sequence is a transplantable lipid-binding helix. *J Biol*  
1312 *Chem* **278**, 40050-40056 (2003).
- 1313 28. Wachi, M. *et al.* Mutant isolation and molecular cloning of mre genes, which  
1314 determine cell shape, sensitivity to mecillinam, and amount of penicillin-  
1315 binding proteins in Escherichia coli. *J Bacteriol* **169**, 4935-4940 (1987).
- 1316 29. Doi, M. *et al.* Determinations of the DNA sequence of the mreB gene and of  
1317 the gene products of the mre region that function in formation of the rod shape  
1318 of Escherichia coli cells. *J Bacteriol* **170**, 4619-4624 (1988).
- 1319 30. Wachi, M. & Matsushashi, M. Negative control of cell division by mreB, a  
1320 gene that functions in determining the rod shape of Escherichia coli cells. *J*  
1321 *Bacteriol* **171**, 3123-3127 (1989).
- 1322 31. Bendezu, F.O., Hale, C.A., Bernhardt, T.G. & de Boer, P.A. RodZ (YfgA) is  
1323 required for proper assembly of the MreB actin cytoskeleton and cell shape in  
1324 E. coli. *EMBO J* **28**, 193-204 (2009).
- 1325 32. Alyahya, S.A. *et al.* RodZ, a component of the bacterial core morphogenic  
1326 apparatus. *Proc Natl Acad Sci U S A* **106**, 1239-1244 (2009).
- 1327 33. van den Ent, F., Johnson, C.M., Persons, L., de Boer, P. & Lowe, J. Bacterial  
1328 actin MreB assembles in complex with cell shape protein RodZ. *EMBO J* **29**,  
1329 1081-1090 (2010).
- 1330 34. Kruse, T., Moller-Jensen, J., Lobner-Olesen, A. & Gerdes, K. Dysfunctional  
1331 MreB inhibits chromosome segregation in Escherichia coli. *EMBO J* **22**,  
1332 5283-5292 (2003).
- 1333 35. Shiomi, D., Sakai, M. & Niki, H. Determination of bacterial rod shape by a  
1334 novel cytoskeletal membrane protein. *EMBO J* **27**, 3081-3091 (2008).
- 1335 36. Ghatak, S., King, Z.A., Sastry, A. & Palsson, B.O. The y-ome defines the 35%  
1336 of Escherichia coli genes that lack experimental evidence of function. *Nucleic*  
1337 *Acids Res* **47**, 2446-2454 (2019).



- 1338 37. Bindal, G., Krishnamurthi, R., Seshasayee, A.S.N. & Rath, D. CRISPR-Cas-  
1339 Mediated Gene Silencing Reveals RacR To Be a Negative Regulator of YdaS  
1340 and YdaT Toxins in Escherichia coli K-12. *mSphere* **2** (2017).
- 1341 38. Stancik, L.M. *et al.* pH-dependent expression of periplasmic proteins and  
1342 amino acid catabolism in Escherichia coli. *J Bacteriol* **184**, 4246-4258 (2002).
- 1343 39. Chodiseti, P.K. & Reddy, M. Peptidoglycan hydrolase of an unusual cross-  
1344 link cleavage specificity contributes to bacterial cell wall synthesis. *Proc Natl*  
1345 *Acad Sci U S A* **116**, 7825-7830 (2019).
- 1346 40. Otoupal, P.B. & Chatterjee, A. CRISPR Gene Perturbations Provide Insights  
1347 for Improving Bacterial Biofuel Tolerance. *Front Bioeng Biotechnol* **6**, 122  
1348 (2018).
- 1349 41. Yamamoto, K. & Ishihama, A. Characterization of copper-inducible  
1350 promoters regulated by CpxA/CpxR in Escherichia coli. *Biosci Biotechnol*  
1351 *Biochem* **70**, 1688-1695 (2006).
- 1352 42. Raivio, T.L., Leblanc, S.K. & Price, N.L. The Escherichia coli Cpx envelope  
1353 stress response regulates genes of diverse function that impact antibiotic  
1354 resistance and membrane integrity. *J Bacteriol* **195**, 2755-2767 (2013).
- 1355 43. Brieger, A. *et al.* C-terminal fluorescent labeling impairs functionality of DNA  
1356 mismatch repair proteins. *PLoS One* **7**, e31863 (2012).
- 1357 44. Shiomi, D. & Margolin, W. The C-terminal domain of MinC inhibits assembly  
1358 of the Z ring in Escherichia coli. *J Bacteriol* **189**, 236-243 (2007).
- 1359 45. Weill, U. *et al.* Assessment of GFP Tag Position on Protein Localization and  
1360 Growth Fitness in Yeast. *J Mol Biol* **431**, 636-641 (2019).
- 1361 46. Falda, M. *et al.* Argot2: a large scale function prediction tool relying on  
1362 semantic similarity of weighted Gene Ontology terms. *BMC Bioinformatics* **13**  
1363 **Suppl 4**, S14 (2012).
- 1364 47. Toronen, P., Medlar, A. & Holm, L. PANNZER2: a rapid functional  
1365 annotation web server. *Nucleic Acids Res* **46**, W84-W88 (2018).
- 1366 48. Kulmanov, M. & Hoehndorf, R. DeepGOPlus: improved protein function  
1367 prediction from sequence. *Bioinformatics* **36**, 422-429 (2020).
- 1368 49. Kelley, L.A., Mezulis, S., Yates, C.M., Wass, M.N. & Sternberg, M.J. The  
1369 Phyre2 web portal for protein modeling, prediction and analysis. *Nat Protoc*  
1370 **10**, 845-858 (2015).
- 1371 50. Yuan, J. *et al.* Vibrio cholerae ParE2 poisons DNA gyrase via a mechanism  
1372 distinct from other gyrase inhibitors. *J Biol Chem* **285**, 40397-40408 (2010).
- 1373 51. Hallez, R. *et al.* New toxins homologous to ParE belonging to three-  
1374 component toxin-antitoxin systems in Escherichia coli O157:H7. *Mol*  
1375 *Microbiol* **76**, 719-732 (2010).
- 1376 52. Lee, N., Francklyn, C. & Hamilton, E.P. Arabinose-induced binding of AraC  
1377 protein to araI2 activates the araBAD operon promoter. *Proc Natl Acad Sci U*  
1378 *S A* **84**, 8814-8818 (1987).
- 1379 53. Malzahn, E., Ciprianidis, S., Kaldi, K., Schafmeier, T. & Brunner, M.  
1380 Photoadaptation in Neurospora by competitive interaction of activating and  
1381 inhibitory LOV domains. *Cell* **142**, 762-772 (2010).
- 1382 54. Heintzen, C., Loros, J.J. & Dunlap, J.C. The PAS protein VIVID defines a  
1383 clock-associated feedback loop that represses light input, modulates gating,  
1384 and regulates clock resetting. *Cell* **104**, 453-464 (2001).
- 1385 55. Hunt, S.M., Elvin, M., Crosthwaite, S.K. & Heintzen, C. The PAS/LOV  
1386 protein VIVID controls temperature compensation of circadian clock phase  
1387 and development in Neurospora crassa. *Genes Dev* **21**, 1964-1974 (2007).

- 1388 56. Lee, C.T., Malzahn, E., Brunner, M. & Mayer, M.P. Light-induced differences  
1389 in conformational dynamics of the circadian clock regulator VIVID. *J Mol*  
1390 *Biol* **426**, 601-610 (2014).
- 1391 57. Mitra, D., Yang, X. & Moffat, K. Crystal structures of Aureochrome I LOV  
1392 suggest new design strategies for optogenetics. *Structure* **20**, 698-706 (2012).
- 1393 58. Takahashi, F. *et al.* AUREOCHROME, a photoreceptor required for  
1394 photomorphogenesis in stramenopiles. *Proc Natl Acad Sci U S A* **104**, 19625-  
1395 19630 (2007).
- 1396 59. Toyooka, T., Hisatomi, O., Takahashi, F., Kataoka, H. & Terazima, M.  
1397 Photoreactions of aureochrome-1. *Biophys J* **100**, 2801-2809 (2011).
- 1398 60. Grusch, M. *et al.* Spatio-temporally precise activation of engineered receptor  
1399 tyrosine kinases by light. *EMBO J* **33**, 1713-1726 (2014).
- 1400 61. Baumschlager, A., Aoki, S.K. & Khammash, M. Dynamic Blue Light-  
1401 Inducible T7 RNA Polymerases (Opto-T7RNAPs) for Precise Spatiotemporal  
1402 Gene Expression Control. *ACS Synth Biol* **6**, 2157-2167 (2017).
- 1403 62. Lutz, R. & Bujard, H. Independent and tight regulation of transcriptional units  
1404 in *Escherichia coli* via the LacR/O, the TetR/O and AraC/I1-I2 regulatory  
1405 elements. *Nucleic Acids Res* **25**, 1203-1210 (1997).
- 1406 63. Baba, T. *et al.* Construction of *Escherichia coli* K-12 in-frame, single-gene  
1407 knockout mutants: the Keio collection. *Mol Syst Biol* **2**, 2006 0008 (2006).
- 1408 64. Chen, X., Zaro, J.L. & Shen, W.C. Fusion protein linkers: property, design  
1409 and functionality. *Adv Drug Deliv Rev* **65**, 1357-1369 (2013).
- 1410 65. <http://parts.igem.org/Promoters/Catalog/Anderson>.
- 1411 66. Lou, C., Stanton, B., Chen, Y.J., Munsky, B. & Voigt, C.A. Ribozyme-based  
1412 insulator parts buffer synthetic circuits from genetic context. *Nat Biotechnol*  
1413 **30**, 1137-1142 (2012).
- 1414 67. Reeder, T. & Schleif, R. AraC protein can activate transcription from only one  
1415 position and when pointed in only one direction. *J Mol Biol* **231**, 205-218  
1416 (1993).
- 1417 68. Ohlendorf, R., Vidavski, R.R., Eldar, A., Moffat, K. & Moglich, A. From dusk  
1418 till dawn: one-plasmid systems for light-regulated gene expression. *J Mol Biol*  
1419 **416**, 534-542 (2012).
- 1420 69. Ramakrishnan, P. & Tabor, J.J. Repurposing *Synechocystis* PCC6803 UirS-  
1421 UirR as a UV-Violet/Green Photoreversible Transcriptional Regulatory Tool  
1422 in *E. coli*. *ACS Synth Biol* **5**, 733-740 (2016).
- 1423 70. Ong, N.T. & Tabor, J.J. A Miniaturized *Escherichia coli* Green Light Sensor  
1424 with High Dynamic Range. *Chembiochem* **19**, 1255-1258 (2018).
- 1425 71. Jayaraman, P. *et al.* Blue light-mediated transcriptional activation and  
1426 repression of gene expression in bacteria. *Nucleic Acids Res* **44**, 6994-7005  
1427 (2016).
- 1428 72. Li, X. *et al.* A single-component light sensor system allows highly tunable and  
1429 direct activation of gene expression in bacterial cells. *Nucleic Acids Res* **48**,  
1430 e33 (2020).
- 1431 73. Siegele, D.A. & Hu, J.C. Gene expression from plasmids containing the  
1432 araBAD promoter at subsaturating inducer concentrations represents mixed  
1433 populations. *Proc Natl Acad Sci U S A* **94**, 8168-8172 (1997).
- 1434 74. Khlebnikov, A., Risa, O., Skaug, T., Carrier, T.A. & Keasling, J.D.  
1435 Regulatable arabinose-inducible gene expression system with consistent  
1436 control in all cells of a culture. *J Bacteriol* **182**, 7029-7034 (2000).

- 1437 75. Morgan-Kiss, R.M., Wadler, C. & Cronan, J.E., Jr. Long-term and  
1438 homogeneous regulation of the Escherichia coli araBAD promoter by use of a  
1439 lactose transporter of relaxed specificity. *Proc Natl Acad Sci U S A* **99**, 7373-  
1440 7377 (2002).
- 1441 76. Hernandez-Candia, C.N., Casas-Flores, S. & Gutierrez-Medina, B. Light  
1442 induces oxidative damage and protein stability in the fungal photoreceptor  
1443 Vivid. *PLoS One* **13**, e0201028 (2018).
- 1444 77. O'Connell, J.D., Zhao, A., Ellington, A.D. & Marcotte, E.M. Dynamic  
1445 reorganization of metabolic enzymes into intracellular bodies. *Annu Rev Cell*  
1446 *Dev Biol* **28**, 89-111 (2012).
- 1447 78. Lindner, A.B., Madden, R., Demarez, A., Stewart, E.J. & Taddei, F.  
1448 Asymmetric segregation of protein aggregates is associated with cellular aging  
1449 and rejuvenation. *Proc Natl Acad Sci U S A* **105**, 3076-3081 (2008).
- 1450 79. Benzinger, D. & Khammash, M. Pulsatile inputs achieve tunable attenuation  
1451 of gene expression variability and graded multi-gene regulation. *Nat Commun*  
1452 **9**, 3521 (2018).
- 1453 80. Zhao, E.M. *et al.* Optogenetic regulation of engineered cellular metabolism for  
1454 microbial chemical production. *Nature* **555**, 683-687 (2018).
- 1455 81. Datsenko, K.A. & Wanner, B.L. One-step inactivation of chromosomal genes  
1456 in Escherichia coli K-12 using PCR products. *Proc Natl Acad Sci U S A* **97**,  
1457 6640-6645 (2000).
- 1458 82. Bowers, L.M., Lapoint, K., Anthony, L., Pluciennik, A. & Filutowicz, M.  
1459 Bacterial expression system with tightly regulated gene expression and  
1460 plasmid copy number. *Gene* **340**, 11-18 (2004).
- 1461 83. Kentner, D., Thiem, S., Hildenbeutel, M. & Sourjik, V. Determinants of  
1462 chemoreceptor cluster formation in Escherichia coli. *Mol Microbiol* **61**, 407-  
1463 417 (2006).
- 1464 84. Thiem, S., Kentner, D. & Sourjik, V. Positioning of chemosensory clusters in  
1465 E. coli and its relation to cell division. *EMBO J* **26**, 1615-1623 (2007).
- 1466 85. Potapov, V. *et al.* Comprehensive Profiling of Four Base Overhang Ligation  
1467 Fidelity by T4 DNA Ligase and Application to DNA Assembly. *ACS Synth*  
1468 *Biol* **7**, 2665-2674 (2018).
- 1469 86. Chung, C.T., Niemela, S.L. & Miller, R.H. One-step preparation of competent  
1470 Escherichia coli: transformation and storage of bacterial cells in the same  
1471 solution. *Proc Natl Acad Sci U S A* **86**, 2172-2175 (1989).  
1472
